# Supplementary material for: The climate and vegetation of Europe, northern Africa, and the Middle East during the Last Glacial Maximum (21 000 yr BP) based on pollen data
Source: Copernicus journal article supplement (doi:10.5194/cp-20-1939-2024), 2024-09-11
Supplement: Supplementary file 1 [file Davis et al 2024 Figure data and LGM pollen counts.xlsx]

## Sheet: Figure Data
SiteName	Entity	Latitude	Longitude	Elevation	SiteNumber	SiteType	Country/Ocean	Data Type	Samples	Source	Reference	COHMAP Quality	Upper 14C	Upper Cal. BP	Lower 14C	Lower Cal. BP	TANN	deltaTANN	diagnostics.Stdev	TDJF	deltaTDJF	diagnostics.Stdev	TJJA	deltaTJJA	diagnostics.Stdev	T_Continentality	PANN	deltaPANN	diagnostics.Stdev	PDJF	deltaPDJF	diagnostics.Stdev	PJJA	deltaPJJA	diagnostics.Stdev	deltaPANN%	P_Seasonality	Biome	Biome_STEP	Arboreal Pollen %	MAT Forest >5m %	Abies	Alnus_All	Betula_All	Carpinus	Cedrus	Corylus	Ephedra	Ephedra fragilis
MD95-2039 (M)	1472	40.5783	-10.3483	-3381	1	Marine	Atlantic	Raw Count	21	EPD (E#1472)	Roucoux et al. 2005	3C	14830±80	18166±269	19950±210	23883±374	5.2	-10.5	4.6	-3.9	-14.6	7.5	15.1	-5.7	2.9	8.9	812.7	-234.3	330.6	221.6	-205.4	110.5	153.1	83.1	53.6	-22	288.5	XERO	XERO	63.149	32.6693	0.0110485	0.257345	0.592753	0	0.0143864	0.203581	0.220238	0.158928
SU81-18 (M)	900012	37.77	-9.82	-3135	2	Marine	Atlantic	Raw Count	10	ACER	Turon et al. 2003	2C	17510±270	20952±404	21250±280	25420±441	7.5	-13.3	3.1	0	-15.2	4	16.1	-10.4	2.8	4.8	812.3	183.3	297.1	260.9	-21.1	126.6	110.1	85.1	47.3	29	106.2	COMX	COMX	91.129	43.6586	0	0.10618	0.0621052	0	0.0387259	0.0744516	0.513144	0
MD99-2331 (M)	900011	41.15	-9.68	-2110	3	Marine	Atlantic	Raw Count	41	ACER	Naughton et al. 2006	2C	16170±130	19325±303	19770±170	23682±336	9.3	-5.3	2.9	2.3	-7.5	3.4	17	-2.3	2.8	5.2	818.4	-420.6	302.6	249.3	-257.7	103.5	127.4	39.4	57.6	-34	297.1	COST	STEP	70.3807	36.7612	0	0.144662	0.202592	0.0102051	0.0311081	0.220438	0.218932	0.0765071
Carn Morval	700006	49.9261	-6.31389	5	4	Lake	United Kingdom	Digitised	1	Publication	Scourse 1991	4C		18600±3700	21500±890/800	25867±1127	10.1	-2.3	2.8	4.7	-3.9	2.5	16.1	-0.7	5	3.2	1011.1	-171.9	482.5	294.1	-97.9	150.9	193.6	-12.4	95.4	-15	85.5	WAST	STEP	5.44662	6.52382	0	0	0	0	0	0.544662	0	0
Gorham Cave	700016	36.1328	-5.34736	0	5	Cave	Spain	Digitised	1	Publication	Carrion et al. 2008	4D			18440±160	22055±341	14.8	-3.5	2.5	7.4	-6	2.5	22.4	-1.3	2.2	4.7	782	42	162.6	429.3	93.3	123.4	24.5	-0.5	12.7	6	-93.8	WAST	STEP	56.6447	29.9663	0	0	0	0	0	0	0	4.90104
Dozmary Pool	600007	50.5347	-4.53583	265	6	Lake	United Kingdom	Raw Count	32	Author	Kelly et al. 2010	2C	14568±129	17569±523	18325±216	21769±602	-3.5	-13.8	4.6	-14.8	-20.8	8.6	8.7	-6.5	3.1	14.3	697.6	-573.4	384.1	143.3	-278.7	119.7	213.1	-22.9	75.6	-45	255.8	COST	STEP	29.7913	22.4458	0.432917	0.901646	0.337172	0	0	0.342825	0	0
Bajondillo	1570	36.6197	-4.49639	20	7	Cave	Spain	Raw Count	1	EPD (E#1570)	Cortes-Sanchez et al 2011	1C		18701±2154			7.1	-9.5	0.7	-1.7	-12.2	0.9	15.9	-7.5	1.4	4.7	688.7	146.7	223.4	125.6	-97.4	78.8	232.2	205.2	7.5	27	302.6	WAST	STEP	16.7665	53.0309	1.79641	1.1976	1.1976	0	1.1976	1.79641	0	0
Laguna del maar de Fuentillejo	1000004	38.938	-4.0539	637	8	Lake	Spain	Digitised	1	Publication	Ruiz-Zapata et al. 2009	5D	16540±90	19847±308			6.5	-9.6	1	1	-7	0.5	13.9	-11.4	1.5	-4.4	886.8	412.8	181.5	249.7	93.7	40.6	152.7	105.7	50.4	87	12	COMX	COMX	67.7419	49.2915	0	0	8.06452	0	0	3.22581	0.806452	0
Padul-1	962	37.0163	-3.6085	785	9	Peat Bog	Spain	Digitised	13	Publication	Pons & Reille 1988	3D	18300±300	21821±412	19100±160	22922±308	8.2	-8.4	4	-1.1	-10.6	5.8	17.8	-7.1	3.2	3.5	637.7	220.7	310.9	192.8	35.8	110.1	108.1	85.1	49.4	53	49.3	WAST	STEP	60.4671	28.9087	0	0.172327	0.227671	0	0.0759175	0.0392465	0.581523	0
Padul-2	800005	37.0108	-3.60389	726	10	Peat Bog	Spain	Digitised	1	Publication	Camuera et al. 2019	1D			17450±539	21082±539	11.1	-5.4	4.4	3.3	-6.2	3	19.9	-5	5.6	1.2	639.7	222.7	235.9	218.5	61.5	69.8	79.7	56.7	51.7	53	-4.8	WAMX	WAMX	83.428	31.645	0	0.757576	0.757576	0	0.473485	0	0	0.284091
Cova di Carihuela	700010	37.4489	-3.4297	1020	11	Cave	Spain	Digitised	1	Publication	Carrion 1992	2C	15700±220	18958±280	21430±130	25659±226	10.6	-5.1	4.2	2.2	-5.8	2.3	19.3	-5.7	5.5	0.1	745.9	194.9	312.5	202.6	15.6	117.6	148.9	91.9	44.5	35	76.3	WAST	STEP	50.2513	28.2818	0	0	0	0	0	0.502513	0.502513	0
Ifri El Baroud	800001	34.75	-3.3	539	12	Cave	Morocco	Digitised	1	Publication	Poti et al. 2019	2D	17296±87	20761±293			11.5	-5.4	2.1	4.2	-6.5	1.8	19.9	-4	2.3	2.5	557.7	100.7	154.2	152.5	-31.5	70.5	97.8	75.8	31.6	22	107.3	WAST	STEP	25.2841	22.6143	0.94697	0	0	0	0	0	0	5.20833
MD95-2043 (M)	900002	36.14	-2.621	-1841	13	Marine	Mediterranean	Raw Count	7	ACER	Fletcher et al. 2008	2C	15440±90	18533±294	18260±120	21951±335	10.8	-7	2	1.3	-11	2.4	20.4	-3.6	2.1	7.4	518.8	304.6	115.9	215.4	178.4	59.3	54.7	-17.3	36.2	142	-195.7	CLMX	CLMX	89.7643	29.7555	0.0494039	0.232166	0.103173	0	1.23105	0	0.579543	0.210548
San Rafael	574	36.7736	-2.60139	0	14	Peat Bog	Spain	Raw Count	2	EPD (E#574)	Pantaléon-Cano 1997	3D	9980±60	11464±133	16860±120	20083±292	13.9	-4.1	2.5	6.6	-5.2	2.6	22.2	-2.6	2.4	2.6	573.9	330.9	128	211.2	124.2	50.6	46.4	32.4	29.8	136	-91.8	XERO	XERO	65.121	24.3861	0	0	1.04167	0	0	1.04167	0	0
Siles	700034	38.24	-2.3	1320	15	Lake	Spain	Digitised	1	Publication	Carrion 2002	2D	17030±80	20345±351			9	-5.3	4	1.9	-4.9	4.4	17	-6.3	4.2	-1.4	960.3	302.3	477	238.7	43.7	50.3	220.9	128.9	224.1	46	85.2	XERO	XERO	42.3645	35.5172	0	0	3.94089	0	0	0.689655	0	0
Torrecilla de Valmadrid	1000005	41.4469	-0.895	570	16	Colluvium	Spain	Digitised	1	Publication	Valero-Garces et al. 2004	2D	17100±85	20456±366			10.6	-3.6	1.3	1.2	-5.4	2.5	19.8	-2.6	1.1	2.8	569.8	179.8	115.1	185.7	110.7	39.3	70.1	-11.9	17.3	46	-122.6	WAST	STEP	55.8904	10.9896	0	0	0	0	0	0	2.19178	0
Navarrés-1	469	39.1	-0.683333	225	17	Peat Bog	Spain	Raw Count	1	EPD (E#469)	Carrión & Dupré-Olivier 1996	4D	18360±195	22001±353	20700±295	24664±411	10.2	-6.8	5.2	1.9	-9	6.2	19.1	-4.7	5	4.3	568.8	147.8	320.5	156.7	60.7	139.2	94.3	43.3	38.7	35	-17.4	XERO	XERO	71.4844	24.772	0	0	0.390625	0	0	0	0.390625	0
Navarrés-2	470	39.1	-0.683333	225	18	Peat Bog	Spain	Raw Count	1	EPD (E#470)	Carrión & Dupré-Olivier 1996	5D	5150±50	5881±85	16000±	19144±	7.6	-9.4	4.4	1.9	-9	2.6	15.1	-8.7	5.5	0.3	898.9	477.9	524.4	245.1	149.1	141.8	163.2	112.2	103	114	-36.9	WAST	STEP	65.1685	33.4968	0	0	2.24719	0	0	0.561798	1.68539	0
Tourbiere de l'Estarres	700037	43.0933	-0.3792	356	19	Lake	France	Digitised	1	Publication	Jalut et al. 1988	1C	17150±250	20522±470	18970±160	22847±317	5.2	-7.7	5.9	-4.7	-10.8	7	14.6	-5.7	5.4	5.1	788.5	-256.5	148.3	163.5	-108.5	52.5	231.4	14.4	74.2	-25	122.9	COST	STEP	30.4147	36.5317	0	0	1.84332	0	0	1.38249	0	0
Cova de les Malladetes	700009	39.058	-0.321	20	20	Cave	Spain	Digitised	1	Publication	Dupré Ollivier 1988	5D	16300±1500	19686±1723			10	-8	6.1	3.7	-8.3	4.4	17.9	-6.9	7.2	1.4	784.1	306.1	534.4	234.6	117.6	146.8	122.5	62.5	108.6	64	-55.1	XERO	XERO	26.5403	6.15961	0	0.473934	0	0	0	0	0	0
Lourdes	834	43.0333	-0.075	430	21	Lake	France	Digitised	15	Publication	Reille & Andrieu 1995	4D	18510±130	22112±130	20025±175	23952±355	9.1	-3.5	3.8	-0.5	-6	4.8	18.7	-1.4	3.9	4.6	584.9	-417.1	225.9	151.4	-104.6	73.4	125.9	-86.1	61	-42	18.5	WAST	STEP	12.5574	33.8939	0	0	0.240219	0	0.0583665	0	0.24758	0
Lake Estanya	1000002	42.0333	0.533333	670	22	Lake	Spain	Digitised	1	Publication	Vegas-Villarubia et al. 2013	5D		9498±50		19184±251	-0.7	-13.5	4.9	-18	-23.1	10.4	15.7	-5.3	2.8	17.8	557.5	-83.5	457.2	124.4	-0.6	183.3	182.8	30.8	35.5	-13	31.4	XERO	XERO	43.6893	34.2227	0	0	3.8835	0	0	0.970874	0	0
Freychinede	700015	42.7833	1.4333	1350	23	Lake	France	Digitised	1	Publication	Jalut et al. 1992	3C	14800±800	17912±856	21300±760	25615±1030	2.6	-8.2	1.3	-15.5	-19.4	2	18.7	-0.2	1.3	19.2	308.9	-819.1	85.5	15.8	-241.2	21.6	196.3	-80.7	46.6	-73	160.5	COST	STEP	17.2764	39.2888	0	0	4.06504	0	0	1.01626	2.03252	0
Banyoles	931	42.1333	2.75	173	24	Lake	Spain	Raw Count	13	EPD (E#931)	Pérez-Obiol & Julia 1994	4C		19878±100		27862±3000	6.4	-7.8	4.4	-4.1	-11.7	7	16.8	-5.1	3.5	6.6	586	-112	366.9	142.6	-14.4	130.9	138.7	-0.3	61.8	-16	14.1	COST	STEP	36.7431	31.4053	0	0.0125282	0.508063	0	0	0.122461	0.368912	0
Lac du Bouchet B5	1000001	44.9167	3.78333	1200	25	Lake	France	Digitised	14	Publication	Reille & de Beaulieu 1988	2C	15350±350	18513±435	19200±300	23006±384	2.1	-6	5.2	-12	-13.3	10.3	15.5	-0.4	1.7	12.9	427.1	-642.9	192	82.9	-168.1	74.4	130.1	-90.9	36.2	-60	77.2	WAST	STEP	53.517	37.2597	0.0330491	0.0991938	0.485679	0	0.0834201	0.0355854	1.17219	0
MD99-2348 (103) (M)	1474	42.6928	3.84167	-296	26	Marine	Mediterranean	Raw Count	41	EPD (E#1474)	Beaudouin et al. 2007	1D	17660±60	21065±310	19350±90	23111±271	6.7	-7.8	2.4	-2	-10	3	15.4	-6.5	2.7	3.5	782.7	164.7	192.7	170.1	12.1	75.8	219	124	58.9	27	111.9	COMX	COMX	79.0325	43.9996	1.41505	1.14331	1.0046	0.643297	0.0816269	0.377615	0.943346	0
Les Echets G	900005	45.9	4.93	267	27	Peat Bog	France	Digitised	136	ACER	de Beaulieu & Reille 1984	1C	17530±270	20970±407	18030±250	21704±473	1.1	-10.2	3.6	-13.8	-17.4	8.6	15.6	-4	2.7	13.4	572.1	-303.9	320.1	121.8	-53.2	114.7	178.5	-36.5	40.3	-35	16.7	WAST	STEP	36.5882	32.7584	0.202683	0	3.76579	0	0.201639	0	0	0.217611
La Grotte Walou	700018	50.5853	5.53639	252	28	Cave	Belgium	Digitised	1	Publication	Damblon 2011	1D				21200±700	3.6	-6.6	4	-8.6	-11.8	8	15.5	-1.4	3.6	10.4	593.3	-309.7	221.4	108.8	-106.2	50.1	199.6	-49.4	52.8	-34	56.8	COST	STEP	12.7979	36.0407	0	0.441306	5.29568	0	0	0	0	0
Bergsee	800002	47.5722	7.93639	382	29	Lake	Germany	Digitised	1	Publication	Duprat-Oualid et al. 2017	2D			17780±90	21244±306	1.4	-8.2	3.3	-9.2	-10.6	6.3	14.8	-2.7	5.1	7.9	507.6	-540.4	102.3	97.7	-91.3	44.2	152.9	-234.1	64.8	-52	-142.8	COST	STEP	18.4932	34.3883	0.195695	0	5.47945	0	0	0.195695	0	0
Garaat El-Ouez	1501	36.8183	8.33333	45	30	Peat Bog	Algeria	Raw Count	6	EPD (E#1501)	Benslama et al 2010	2C	16010±320	19200±801			10.7	-6.6	2.3	1.8	-9.2	2	19.6	-4.6	2.7	4.6	567.9	-262.1	196	189.9	-170.1	50.4	81.5	48.5	60.1	-32	218.6	WAST	STEP	49.3894	27.1261	0.084317	0.121216	0	0	1.69149	0	0	0.835411
Pian del Lago	800006	44.3216	9.48568	833	31	Lake	Italy	Digitised	1	Publication	Guido et al. 2020	2D				21260±320	7.3	-5.1	3.3	-2.1	-7.2	5.7	17	-3	3.1	4.2	1064.7	69.7	691.5	182.9	-83.1	80.9	364.4	215.4	288.3	7	298.5	COMX	COMX	66.7568	51.5974	5.4955	1.26126	1.89189	0	0	0.45045	0.540541	0
Pilsensee	700030	48.0267	11.1883	534	32	Lake	Germany	Digitised	1	Publication	Küster 1995	6D	15860±250	19073±290			0.1	-9.2	1.2	-8	-8.5	1.9	10.3	-7.3	5	1.2	712.2	-234.8	318	161.4	10.4	106.4	214.4	-159.6	62	-25	-170	TAIG	TAIG	64.9261	19.5579	0	0	34.8768	0	0	0	0	0
Orgiano	700028	45.29	11.43	19	33	Peat Bog	Italy	Digitised	1	Publication	Paganelli 1996	2D	17760±160	21221±373	19290±520	23141±621	6.8	-6.2	1.5	-0.7	-4	1.2	14.7	-7.6	1.8	-3.6	1374.5	467.5	529.1	345.5	145.5	192	362.9	134.9	70.8	52	-10.6	COMX	COMX	73.229	60.513	3.8715	3.78913	2.22405	0	0	0	0.823723	0
Lago della Costa	700020	45.2703	11.7431	7	34	Lake	Italy	Digitised	8	Publication	Kaltenrieder et al. 2009	2C	15400±150	18484±330	19285±160	23052±302	3.1	-9.7	2.6	-3.5	-6.8	2.6	10.7	-11.4	2.7	-4.6	1207.3	319.3	362.8	315.8	119.8	121.7	243.2	19.2	55.1	36	-100.6	COMX	COMX	57.7541	33.298	0.313249	1.11594	5.16763	0.660841	0	0	0.0222273	0.0971202
Lagaccione	916	42.5667	11.85	355	35	Lake	Italy	Raw Count	7	ACER	Magri 1999	2C	16080±450	19369±527	20615±940	24746±1201	4.6	-9.5	2.1	-6.8	-14	3.7	15.6	-6.1	1.3	7.9	440.6	-264.4	192.5	81.7	-121.3	70.7	123.8	14.8	31.3	-38	136.1	WAST	STEP	23.6689	32.3546	0	0.104565	0	0	0	0	0.244197	0.144311
Lago Vico	54092	42.3167	12.1667	510	36	Lake	Italy	Digitised	15	Publication	Magri & Sadori 1999	3C	14385±140	17541±272	20500±230	24430±376	7.1	-6.5	3.4	-3.3	-9.7	4.2	17.3	-4.2	3.1	5.5	504.6	-365.4	203.1	117	-141	75.9	121.2	-10.8	36.3	-42	130.2	WAST	STEP	27.8629	36.4298	0.0757679	0.0949399	0.0764539	0	0.0400781	0	0.262299	0.444828
Stracciacappa	900009	42.13	12.32	220	37	Lake	Italy	Raw Count	2	ACER	Giardini 2007	4C	12060±130	14093±281	19745±820	22675±955	10	-4.6	6.5	2.3	-5	8.5	18.1	-4.2	5.5	0.8	702.6	-164.4	275.8	168.8	-97.2	73.5	163	48	83.7	-19	145.2	COST	STEP	6.6995	36.4412	0	0	0	0	0	0.201613	0	0
Lago di Monterosi	51017	42.2167	12.4333	237	38	Lake	Italy	Raw Count	1	Publication	Bonatti 1970	2D	17040±350	20398±544			7.1	-7.9	4.5	-5	-12.6	9.3	19	-3.8	2	8.8	733.2	-103.8	499.8	215.1	-32.9	231.1	160.3	45.3	30.6	-12	78.2	COST	STEP	15.625	43.3152	0	0	0.625	0	0	0	0	0
Venice	800007	45.6295	12.6541	0	39	Peat Bog	Italy	Digitised	1	Publication	Miola et al. 2006	5D			18640±100	22277±336	1.5	-11.8	0.3	-9.9	-14.3	4.8	13.2	-8.9	3.6	5.4	703	-347	390.5	159.4	-61.6	161.9	223.1	-53.9	35.2	-33	7.7	XERO	XERO	40.9409	14.1047	0	0	2.002	0	0	0	0	0
Azzano Decimo	900008	45.8833	12.7165	10	40	Alluvial Fan	Italy	Raw Count	6	ACER	Pini et al. 2009	2D	18000±300	21637±529	21025±245	25179±449	3.1	-10.2	1.2	-8.4	-12.7	4.1	14.5	-7.6	3	5.1	654.8	-515.2	259	140.1	-100.9	107.8	198.1	-112.9	34.2	-44	-12	XERO	XERO	49.8629	29.2413	0	0.160377	0.911772	0	0	0.0837521	0	0.109798
Valle di Castiglione	900010	41.89	12.75	44	41	Lake	Italy	Raw Count	2	ACER	Follieri et al. 1989	3C	14220±145	17443±270	20300±700	24266±842	6	-10.2	2.6	-4.2	-13.2	3.6	15.9	-8.1	2.3	5.1	512.6	-475.4	185.4	130.7	-163.3	71	104.7	-39.3	44.5	-48	124	WAST	STEP	42.0687	34.4419	0	0	0	0	0.141643	0	0	0.35461
Travesio	700039	46.2	12.87	220	42	Lake	Italy	Digitised	1	Publication	Monegato et al. 2007	5D			18780±200	22483±406	7	-5.6	4.4	1	-2.7	4.1	14.8	-6.5	4.1	-3.8	1194.9	-220.1	340.4	397.4	116.4	110.5	121.3	-253.7	43.1	-16	-370.1	XERO	XERO	94.1799	44.7256	0	0	0	0	0	0	0	0
Orvenco	800010	46.2521	13.1698	380	43	Alluvial Fan	Italy	Digitised	1	Publication	Monegato et al. 2007	2D	17760±160	21221±373	19290±520	23141±621	3.1	-9.9	8.2	-9.9	-13.1	14	16.1	-6.2	2.9	6.9	639.4	-267.6	373.6	189.4	-10.6	187.9	148.3	-79.7	67.4	-30	-69.1	TAIG	TAIG	89.3004	52.9966	0	0	0	0	0	0	0	0
Rio Doidis	700031	46.12	13.19	152	44	Lake	Italy	Digitised	1	Publication	Monegato et al. 2007	5D			18860±190	22390±373	7.4	-5.4	4.3	-0.2	-4.3	5.3	15.7	-5.5	3.7	-1.2	972.9	-556.1	367.2	345.3	30.3	160.5	127.7	-264.3	69.1	-36	-294.6	XERO	XERO	97.4093	48.1926	0	0	0	0	0	0	0	0
Billerio	700004	46.22	13.21	300	45	Lake	Italy	Digitised	1	Publication	Monegato et al. 2007	3D			18165±200	21872±382	1.5	-11.2	0.5	-15.2	-19.2	0.6	17.1	-4.1	0.4	15.1	432.4	-1096.6	35.5	62.8	-252.2	6.2	189.9	-202.1	12.8	-72	50.1	TAIG	TAIG	71.1177	34.8622	0	0	1.28586	0	0	0	0	0
Kersdorf-Briesen	700017	52.3337	14.2691	44	46	Lake	Germany	Digitised	1	Publication	Strahl 2005	1D			17622±94	21183±356	1.5	-7.3	0.3	-15.3	-14.3	0.4	17.3	-0.6	0.1	13.7	412.9	-125.1	18.9	57.9	-52.1	3.9	183.4	8.4	6.1	-23	60.5	TAIG	TAIG	76	14.0904	0	0	21	0	0	0	0	0
Lago Grande di Monticchio	932	40.9444	15.6	1326	47	Lake	Italy	Raw Count	6	EPD (E#932)	Watts et al. 1996	2C		20204±		24014±	8.2	-3.3	2.8	-0.5	-4.6	2.9	17	-2.8	3	1.8	612.9	94.9	226.9	164.9	10.9	68.5	112.4	36.4	45.9	18	25.5	WAST	STEP	42.1931	31.0569	0.0428449	0.17346	0.21696	0	0	0	0.283807	0
Nagymohos	54087	48.3269	20.4364	297	48	Peat Bog	Hungary	Raw Count	14	Publication	Magyari et al 1999	2C	14246±144	17361±425	18159±247	21735±622	-1.1	-10.5	4.1	-15.9	-14.4	6.4	13.6	-5.5	3.6	8.9	517.9	-98.1	203	92.6	-10.4	60.2	190.6	-39.4	46.7	-16	-29	COST	STEP	55.9805	24.9917	0	0.0854511	2.67598	0.021978	0	0.059572	0	0.183127
Safarka	700033	48.8819	20.575	600	49	Peat Bog	Slovakia	Digitised	1	Publication	Jankovska 2008	3D			18287±1512	21912±1781	-1	-7.9	2.8	-17.5	-14.4	3.9	15.2	-0.8	1.5	13.6	464.6	-290.4	72.4	56.2	-62.8	30.1	221.5	-58.5	37.8	-38	4.3	TAIG	TAIG	89.3555	52.2801	0	4.34468	4.34468	0.362056	0	0.362056	0	0
Feher Lake	54079	46.45	20.65	86	50	Lake	Hungary	Raw Count	10	Publication	Magyari et al. 2014	1D	17715±250	21190±463	19911±81	23841±313	2.7	-8.2	3.3	-7.3	-7.3	4.7	13.1	-7.6	2.8	-0.3	827.1	281.1	243.7	185.1	73.1	88	251.2	66.2	54.3	51	-6.9	COMX	COMX	79.3367	36.0779	0	0.628627	3.82603	0.579552	0	1.23907	0	0
Ioannina	900006	39.75	20.85	470	51	Peat Bog	Greece	Raw Count	20	ACER	Tzedakis et al. 2004	3C	15330±140	18420±312	20760±230	24748±330	7.4	-7.2	2.4	-0.1	-6.5	2.7	15.6	-7.7	2.8	-1.2	847.7	-152.3	294.4	193.6	-170.4	106.3	219.1	121.1	40.3	-15	291.5	WAST	STEP	23.9416	44.0903	1.86393	0.418002	1.67504	0.406883	0	0.495454	0.128271	0.0977483
Kokad	800008	47.4028	21.9286	112	52	Peat Bog	Hungary	Raw Count	2	Publication	Magyari et al. 2019	5D	14326±63	17433±443	16280±90	19685±538	5.6	-4.5	2.3	-5.8	-4.9	3	16.9	-2.9	2.7	2	624.1	23.1	68.9	124.2	-5.8	23.8	210	6	16.3	4	11.8	COST	STEP	58.9723	33.4071	0	0.135501	2.34445	0	0	0.126904	0.397906	0
Lake Xinias	976	39.05	22.27	500	53	Lake	Greece	Raw Count	5	EPD (E#976)	Bottema 1979	6C	11150±130	13049±160	21390±430	25671±648	8.8	-6.7	3.5	2	-5.5	2	16.5	-7.5	4.5	-2	872.2	309.2	287.9	208.8	-2.2	71.3	201.2	154.2	70.8	55	156.4	WAST	STEP	22.2031	37.1531	0.957479	0.642089	2.08736	0	0	0.217915	0.288957	0.102341
Mickunai	700027	54.7221	25.5322	143	54	Lake	Lithuania	Digitised	1	Publication	Satkunas & Grigiene 2012	1D		21000±2200			-1.4	-7.3	1.1	-8.9	-3.9	0.7	7.4	-8.9	1.3	-5	1156.3	474.3	246.9	343.2	212.2	95.5	265.6	35.6	23	70	-176.6	COCO	COCO	80.6232	45.196	0	11.3924	18.7926	3.0185	0	6.23174	0	0
Lake Sfanta Anna	700023	46.1264	25.8881	946	55	Lake	Romania	Digitised	1	Publication	Magyari et al. 2014	1D	17626±96	20955±432			3.1	-8.5	1.6	-4.7	-9.8	3.6	11.5	-6.8	2.1	3	1054.1	187.1	250.5	274.2	21.2	91.7	227.6	55.6	21.6	22	34.4	COMX	COMX	65.4158	30.7874	0	0	2.43408	0.507099	0	0	1.0142	0
Megali Limni	700026	39.1	26.3	323	56	Lake	Greece	Digitised	1	Publication	Margari et al. 2009	6D	19072±237	22906±340			8.6	-6.8	1.1	0.6	-7.6	1.3	16.9	-6.4	1.4	1.2	718.8	34.8	166	157.8	-199.2	48.8	199.5	171.5	40.8	5	370.7	COST	STEP	26.2045	42.0059	0	0	2.58519	0	0	1.05758	0	0
Straldzha	800009	42.6303	26.77	138	57	Peat Bog	Bulgaria	Raw Count	3	Publication	Connor et l. 2013	6C	14696±65	18022±364	23653±114	28580±390	8.1	-4.3	5.8	-0.8	-3.4	6.1	17.4	-4.3	6.1	-0.9	650.2	59.2	402.4	163.6	5.6	109.5	135.7	0.7	82.4	10	-4.9	COST	STEP	30.8173	31.6857	0	0.133869	1.13434	0	0	0.133869	0	0
MD01-2430 (M)	800004	40.7968	27.7252	-580	58	Marine	Turkey	Digitised	1	Publication	Valsecchi et al. 2012	4C	12050±75	14904±324	18310±380	21746±968	6.9	-11.1	5.1	-2.6	-11.3	8.1	16.5	-11	3.9	0.3	795.6	200.6	218.7	198.2	-20.8	78.9	188.1	113.1	53.4	34	133.9	COST	STEP	81.405	27.5965	0.330579	0.247934	0.826446	0.495868	0	0.495868	0	0
Lake Iznik	2323	40.4339	29.5331	88	59	Lake	Turkey	Raw Count	7	EPD (E#714)	Miebach et al 2016	7D	16910±100	19515±115			9	-4.9	4.5	-0.4	-6.5	5.7	18.7	-3.1	4.5	3.4	584	-93	279.5	137.9	-112.1	80.7	131.2	46.2	60.4	-14	158.3	WAST	STEP	34.4629	33.3866	0.0526206	0.0573726	0.601444	0	0	0.0265041	0.112063	0
M72/5 628-1 (M)	600006	42.1035	36.6238	-418	60	Marine	Black Sea	Raw Count	6	Pangaea (833387)	Shumilovskikh et al. 2014	2C	16835±85	18490±	19495±90	21280±	12.1	-2.3	3.2	3.1	-4.9	3.8	21.4	-0.2	3.5	4.7	559	-298	149	134.2	-116.8	67.1	129	-27	56.5	-35	89.8	WAST	STEP	40.8315	21.2643	0.38892	0.163934	0.439575	0.654416	0.112245	2.32125	0.222912	0.0566893
Dziguta	700012	42.99	41.07	35	61	Peat Bog	Georgia	Digitised	1	Publication	Arslanov et al. 2007	4C	12990±160	15839±483	20560±880	24666±1126	8.5	-5.5	3.4	-0.8	-7.3	7	18.1	-3.5	1.7	3.8	712.4	-836.6	333.1	176.5	-232.5	82.3	153.2	-219.8	85.1	-54	12.7	CLMX	CLMX	95.3875	33.551	2.76753	0	0.922509	0	0	0	1.84502	0
Lake Van LG	600003	38.667	42.669	1649	62	Lake	Turkey	Raw Count	10	Pangaea (853779)	Pickarski et al. 2015	2C		18590±62		23290±596	14	2	4.9	4.6	3.8	5.2	23.3	0.3	5	-3.5	406.7	-228.3	264.4	121.5	-79.5	57.5	74.6	40.6	82.8	-36	120.1	WAST	STEP	2.92759	32.3226	0	0.101421	0.121733	0.0203666	0	0	0.482559	0.181344
Lake Zeribar	714	35.5333	46.1167	1286	63	Lake	Iran	Raw Count	17	EPD (E#714)	van Zeist & Bottema 1977	4C	13650±160	16610±399	22000±500	26462±880	14.9	-2.2	4.6	4.7	-0.3	3.8	25.1	-3.9	5.1	-3.6	333.1	-93.9	207.7	105.3	-61.7	34.8	64.8	58.8	80.1	-22	120.5	WAST	STEP	1.2329	40.3068	0	0.0357767	0.00738989	0	0.00784314	0	0.0716515	0.0979862
[truncated: 59 more columns]

## Sheet: Fossil Pollen Data
SiteNumber	SiteName	Entity	Data Type	Source	SampleNumber	Age Cal BP	Chron	Abies	Acacia	Acer	Allium	Alnus	Alnus fruticosa	Alnus glutinosa type	Apiaceae	Arbutus	Armeria	Artemisia	Asteraceae	Asteraceae (Asteroideae)	Asteraceae (Cichorioideae)	Asteroideae	Betula	Betula alba	Betula nana	Boraginaceae	Brassicaceae	Buxus	Calluna	Campanulaceae	Cannabis	Carpinus	Caryophyllaceae	Castanea	Cedrus	Centaurea	Ceratonia	Chenopodiaceae	Cichorioideae	Cistus	Compositae	Convolvulaceae	Cornus	Corylus	Crassulaceae	Cyperaceae	Dipsacaceae	Dryas	Empetrum
1	MD95-2039	1472	Raw Count	EPD (E#1472)	25	18745	2					2					2	13		7	5		1				1						3					7								5
1	MD95-2039	1472	Raw Count	EPD (E#1472)	26	18979	2					3			1			8		4	10		3				1	1										8						1		7
1	MD95-2039	1472	Raw Count	EPD (E#1472)	27	19213	2								1			13		6	6		3										2					5						3		1
1	MD95-2039	1472	Raw Count	EPD (E#1472)	28	19447	2								1			11		13	7		2				1						2					6								4
1	MD95-2039	1472	Raw Count	EPD (E#1472)	29	19681	2								2			8		11	8		1				2						1					2						1		8
1	MD95-2039	1472	Raw Count	EPD (E#1472)	30	19915	2					1			3			10		5	8		1				1											2						1		3
1	MD95-2039	1472	Raw Count	EPD (E#1472)	31	20149	2								2			9		3	8		4					1										1						2		11
1	MD95-2039	1472	Raw Count	EPD (E#1472)	32	20383	2								1			17		3	5								2									2						1		10
1	MD95-2039	1472	Raw Count	EPD (E#1472)	33	20617	2					1			1			5		7	4		1				1	1						1	1			2								3
1	MD95-2039	1472	Raw Count	EPD (E#1472)	34	20851	2					2			1		1	11		11	7		1					1					1					3								5
1	MD95-2039	1472	Raw Count	EPD (E#1472)	35	21085	2					1			2			8		8	5		1				3											4						1		9
1	MD95-2039	1472	Raw Count	EPD (E#1472)	36	21319	2					2			2			21		5	9		3															7								7
1	MD95-2039	1472	Raw Count	EPD (E#1472)	37	21529	2					1			1			14		15	10		5				2		1				1			1		5						1		2
1	MD95-2039	1472	Raw Count	EPD (E#1472)	38	21740	2					1			1			5		8	14		4															5								6
1	MD95-2039	1472	Raw Count	EPD (E#1472)	39	21974	2					1			1			20		7	9		2				1	1					2					4						2		3
1	MD95-2039	1472	Raw Count	EPD (E#1472)	40	22208	2					3						5		6	6		2				4		1									5						2		3
1	MD95-2039	1472	Raw Count	EPD (E#1472)	41	22442	2	1				1						10		5	9		3				1						1					6					1	1		9
1	MD95-2039	1472	Raw Count	EPD (E#1472)	42	22675	2								2			7		9	12		4										2					4								11
1	MD95-2039	1472	Raw Count	EPD (E#1472)	43	22909	2											9		9	10		1						3									3								10
1	MD95-2039	1472	Raw Count	EPD (E#1472)	44	23213	2								2			6		9	9		1						1				1					1								4
1	MD95-2039	1472	Raw Count	EPD (E#1472)	45	23272	2								2		1	3		11	7								1				1					2								7
2	SU81-18	900012	Raw Count	ACER	22380	19233	100					5						67		8	3						4						1			3		21		1				2		5
2	SU81-18	900012	Raw Count	ACER	22381	19637.5	100											33		2	4		1				2						1			1		10		1				1		1
2	SU81-18	900012	Raw Count	ACER	22382	20050	100											17		8	9						1						1					2		2						9
2	SU81-18	900012	Raw Count	ACER	22383	20465.1	100								2			34		7	12						1								1			14		2						6
2	SU81-18	900012	Raw Count	ACER	22384	20878.6	100								2			40		4	19		1															9		1						4
2	SU81-18	900012	Raw Count	ACER	22385	21288.5	100					2						14		8	11					1									1			3		1				1		8
2	SU81-18	900012	Raw Count	ACER	22386	21693.5	100								1			48		2	7		1				1						1			1		17		2						6
2	SU81-18	900012	Raw Count	ACER	22387	22092	100											65		7	15														1			23						1		4
2	SU81-18	900012	Raw Count	ACER	22388	22482.6	100					2						36		2	5		1				2						2			1		13		2				1		2
2	SU81-18	900012	Raw Count	ACER	22389	22863.7	100					2						9		4	14					1							1		1	2		9		3						9
3	MD99-2331	900011	Raw Count	ACER	5748	19051.4	100											1		10	10						1		4							2								2		5
3	MD99-2331	900011	Raw Count	ACER	5749	19138.8	100					1						3		9	6		2						2				4		1	1		1								9
3	MD99-2331	900011	Raw Count	ACER	5750	19226.6	100											7		12	5								6				1			2								1		5
3	MD99-2331	900011	Raw Count	ACER	5751	19314.9	100											3		8	11								6				1					1						1		4
3	MD99-2331	900011	Raw Count	ACER	5752	19403.6	100											4		10	7								1				2					1						1		11	1
3	MD99-2331	900011	Raw Count	ACER	5753	19492.8	100								1			2		12	18								4				1			1		2								5	1
3	MD99-2331	900011	Raw Count	ACER	5754	19582.4	100					2						3		13	5								5				1					1								7
3	MD99-2331	900011	Raw Count	ACER	5755	19672.5	100											3		4	7		3						7				2			1		1						1		5
3	MD99-2331	900011	Raw Count	ACER	5756	19763	100											3		6	14								4				2		1			1						1		6
3	MD99-2331	900011	Raw Count	ACER	5757	19854	100											3		3	8								2	1			2											1		5	1
3	MD99-2331	900011	Raw Count	ACER	5758	19945.4	100											2		9	4								4				1			2		1								6
3	MD99-2331	900011	Raw Count	ACER	5759	20037.2	100											2		7	5		1						5				1			1										7
3	MD99-2331	900011	Raw Count	ACER	5760	20129.5	100					1						4		7	8								4				1			1		3						1		6	2
3	MD99-2331	900011	Raw Count	ACER	5761	20222.3	100											1		6	9								4				1					2						1		11
3	MD99-2331	900011	Raw Count	ACER	5762	20315.5	100											2		2	13		1						4							1		1								5
3	MD99-2331	900011	Raw Count	ACER	5763	20409.2	100											2		13	9								4				1					1						1		5	1
3	MD99-2331	900011	Raw Count	ACER	5764	20503.3	100											3		14	9		2						10				4					2								3	2
3	MD99-2331	900011	Raw Count	ACER	5765	20597.9	100											2		11	7		1						4			1	1			1										4	2
3	MD99-2331	900011	Raw Count	ACER	5766	20692.9	100					2						2		9	9		1						9				3			1		1								9	1
3	MD99-2331	900011	Raw Count	ACER	5767	20788.4	100											2		10	13		1						3				3													3	1
3	MD99-2331	900011	Raw Count	ACER	5768	20884.3	100											2		6	8		1						7				1			1		1								5	1
3	MD99-2331	900011	Raw Count	ACER	5769	20980.7	100											1		6	9								2				2			3										10	1
3	MD99-2331	900011	Raw Count	ACER	5770	21077.5	100											2		7	8		1			1			5				1											2		8
3	MD99-2331	900011	Raw Count	ACER	5771	21174.8	100											5		12	7								7															1		3
3	MD99-2331	900011	Raw Count	ACER	5772	21272.6	100											3		6	7					1			7				2					2								3
3	MD99-2331	900011	Raw Count	ACER	5773	21370.8	100													9	19								5				1			2		1								6
3	MD99-2331	900011	Raw Count	ACER	5774	21469.4	100											3		5	6						1		5				1													5
3	MD99-2331	900011	Raw Count	ACER	5775	21568.6	100											5		12	5		1						8				2					1						1		7
3	MD99-2331	900011	Raw Count	ACER	5776	21668.1	100					1						5		5	6								12									2								8
3	MD99-2331	900011	Raw Count	ACER	5777	21768.2	100											2		8	9								6				1					2								8	1
3	MD99-2331	900011	Raw Count	ACER	5778	21868.7	100											2		16	8								10	1			1					2				1				5
3	MD99-2331	900011	Raw Count	ACER	5779	21969.6	100					1						1		15	8								5							1										7	1
3	MD99-2331	900011	Raw Count	ACER	5780	22071.1	100											6		9	9		1						3				2			1										5
3	MD99-2331	900011	Raw Count	ACER	5781	22172.9	100					1								9	7								3				2							1						7
3	MD99-2331	900011	Raw Count	ACER	5782	22275.3	100					1						7		13	15								7				5					1								10
3	MD99-2331	900011	Raw Count	ACER	5783	22378.1	100			1								3		5	12								9				4					1								4	1
3	MD99-2331	900011	Raw Count	ACER	5784	22481.3	100					1						2		5	9		1						11				1			1		2								5
3	MD99-2331	900011	Raw Count	ACER	5785	22585	100					1						4		5	11								6									2		1				1		5	1
3	MD99-2331	900011	Raw Count	ACER	5786	22689.2	100					1						4		9	6								11				2		1			2								4
3	MD99-2331	900011	Raw Count	ACER	5787	22793.9	100													5	16								7				1											1		8
3	MD99-2331	900011	Raw Count	ACER	5788	22899	100								1			1		7	10								7				2			1		2						1		7
4	Carn Morval	700006	Digitised	Publication	1	20668	100								1				36		2						0.9						3											0.5		10
5	Gorham Cave	700016	Digitised	Publication	1	21000	100											2	4								3
6	Dozmary Pool	600007	Raw Count	Author	35	19229	100								2			6			2												12					3						3		32			4
6	Dozmary Pool	600007	Raw Count	Author	36	19437	100					7						3					3										13					3							3	29	2
6	Dozmary Pool	600007	Raw Count	Author	37	19691	100					1						6											1				9					5							2	40
6	Dozmary Pool	600007	Raw Count	Author	38	19899	100					1						8					2										2					8								45
6	Dozmary Pool	600007	Raw Count	Author	39	20152	100					1			1			12					1										25					1								30
6	Dozmary Pool	600007	Raw Count	Author	40	20360	100					2			2			5															7													42			1
6	Dozmary Pool	600007	Raw Count	Author	41	20614	100										4	5		3	3												6					1								32			1
6	Dozmary Pool	600007	Raw Count	Author	42	20822	100					6						2									3						1					16						3	2	36			1
6	Dozmary Pool	600007	Raw Count	Author	43	21076	100					1					1	16		1	1		1										3					10							7	38			2
6	Dozmary Pool	600007	Raw Count	Author	44	21284	100					5			1			5					3										1					8						2		42		1	5
6	Dozmary Pool	600007	Raw Count	Author	45	21537	100					3					2	7			1												11					3								22			4
6	Dozmary Pool	600007	Raw Count	Author	46	21745	100								1			11								4							5					1								24
6	Dozmary Pool	600007	Raw Count	Author	47	21981	100										7	6		3													9					3							2	36			3
6	Dozmary Pool	600007	Raw Count	Author	48	22015	100								2			4		1						2	2						6											2		27
6	Dozmary Pool	600007	Raw Count	Author	49	22078	100	1										4			1		1										6					1							2	37			1
6	Dozmary Pool	600007	Raw Count	Author	50	22122	100	5				1						8	1														2					2								26			3
6	Dozmary Pool	600007	Raw Count	Author	51	22175	100	1									1	2		1													11					9								63			3
6	Dozmary Pool	600007	Raw Count	Author	52	22219	100	3				3			2			9					4										4			1		3								37			3
6	Dozmary Pool	600007	Raw Count	Author	53	22273	100	5				3						3					3										2													65			6
6	Dozmary Pool	600007	Raw Count	Author	54	22316	100	2				7			7		1	3	1				2										3					1				2		2		47			2
6	Dozmary Pool	600007	Raw Count	Author	55	22370	100	1				1						3			3												14													53			6
6	Dozmary Pool	600007	Raw Count	Author	56	22414	100					3			1			10			1												6					11				1		6		50			13
6	Dozmary Pool	600007	Raw Count	Author	57	22467	100	3				3			1			2			1												10					2								65			7
6	Dozmary Pool	600007	Raw Count	Author	58	22511	100	1				4			7			2					2										9					9						4		54
6	Dozmary Pool	600007	Raw Count	Author	59	22565	100	2				2			1			9			1												17					1								38			1
6	Dozmary Pool	600007	Raw Count	Author	60	22608	100	1							3			1			1		2				1						8					6								51			1
6	Dozmary Pool	600007	Raw Count	Author	61	22662	100	1				1																					20													64
6	Dozmary Pool	600007	Raw Count	Author	62	22706	100	1				9						8															3					21						4	4	46			3
6	Dozmary Pool	600007	Raw Count	Author	63	22759	100																										1													32
6	Dozmary Pool	600007	Raw Count	Author	64	22803	100											1																				4								32
6	Dozmary Pool	600007	Raw Count	Author	65	22856	100											2															2													18
6	Dozmary Pool	600007	Raw Count	Author	66	22890	100	1										1																				4								43
7	Bajondillo	1570	Raw Count	EPD (E#1570)	54	20785	2	3				2						28		3	4		2				1								2			19		2				3		2
8	Laguna del maar de Fuentillejo	1000004	Digitised	Publication	1	21000	100											1		7	3		10				1											8						4		12
9	Padul	962	Digitised	Publication	59	19239	1					1			1			62		2	1												1		1			15								31	1
9	Padul	962	Digitised	Publication	60	19825	1											53		1							1											8						1		5
9	Padul	962	Digitised	Publication	61	20380	1					1						96		9			1				2											12								30
9	Padul	962	Digitised	Publication	62	21436	1					2						70		8	1						1						1					11		1						14
9	Padul	962	Digitised	Publication	63	21928	1					1						58		9	2																	12								8	1
9	Padul	962	Digitised	Publication	64	22147	1											49		4																		6								12
9	Padul	962	Digitised	Publication	65	22294	1								1		1	9		1																		2								5
9	Padul	962	Digitised	Publication	66	22412	1					1			1			30		3	1																	14								80
9	Padul	962	Digitised	Publication	67	22523	1											10		3			1				2						1					10								80	1
9	Padul	962	Digitised	Publication	68	22622	1								1			74		3							1									1		11								23
9	Padul	962	Digitised	Publication	69	22709	1					1						50		6			1				1											11								33
9	Padul	962	Digitised	Publication	70	22788	1								1			45		1	2		1				3								1			3								73
9	Padul	962	Digitised	Publication	71	22856	1											22		4			1				1											4								30
10	Padul-15-05	800005	Digitised	Publication	1	22056	100			0.2		0.8						5		0.8	0.1		0.8												0.5			5
11	Cova di Carihuela	700010	Digitised	Publication	1	19010	100								0.5			6	0.5	8	12						0.5						0.5			0.5		0.5						0.5
12	Ifri El Baroud	800001	Digitised	Publication	1	21000	100	1										15.1	0.9		1.4																	15.1
13	MD95-2043	900002	Raw Count	ACER	5640	19668.6	100					1						19	1	7	1						1		1						15	1		5
13	MD95-2043	900002	Raw Count	ACER	5641	19908.4	100					1						24	1	1	1		1												1			3
13	MD95-2043	900002	Raw Count	ACER	5642	20268.1	100	1				1						17		12	4								2				1		9	1		10
13	MD95-2043	900002	Raw Count	ACER	5643	20507.9	100											19	1	9	5		1				1						1		6.5			8								1
13	MD95-2043	900002	Raw Count	ACER	5644	21107.4	100											23		1	3								1				2		2			3								1
13	MD95-2043	900002	Raw Count	ACER	5645	21467.1	100	1				2						11	1	4	4														8			3									1
13	MD95-2043	900002	Raw Count	ACER	5646	21693.6	100					2						35		3	2														6			6
14	San Rafael	574	Raw Count	EPD (E#574)	158	18870.3	0								1			1			1		1															4						1	1
14	San Rafael	574	Raw Count	EPD (E#574)	159	20010.2	0								1			1		3	2												1					46								1
15	Siles	700034	Digitised	Publication	1	20345	100			0.5								24.6					4				0.5	0.5					0.5					3.3		0.5				0.7
16	Torrecilla de Valmadrid	1000005	Digitised	Publication	1	20456	100											2.5		1	5.5						5.5											4.75								2	1
17	Navarres	469	Raw Count	EPD (E#469)	15	19104	0								12			34		1			1															4								10
18	Navarres	470	Raw Count	EPD (E#470)	30	19142.3	0								2			36		2			4				2																	1		10
19	Tourbiere de lEstarres	700037	Digitised	Publication	1	21000	100								1			7		2.5	1.5		2										1					2						1.5		4.5
20	Cova de les Malladetes	700009	Digitised	Publication	1	19686	100					0.5						0.5		3	4																	8
21	Lourdes	834	Digitised	Publication	118	19254	2								4			32		4	4						9						1					5							1	20
21	Lourdes	834	Digitised	Publication	119	19475	2								3			18		4	2		1				6						1		1	1		4								26
21	Lourdes	834	Digitised	Publication	120	19582	2								7			16		1	2						3		1				1					4								18
21	Lourdes	834	Digitised	Publication	121	19762	2								7			16		2	1						2		2				1					4								14	1
21	Lourdes	834	Digitised	Publication	122	20012	2								8			14		2	1						1		1				1					3								20
21	Lourdes	834	Digitised	Publication	123	20192	2								5			16		1	2		1				3						1					3								18
21	Lourdes	834	Digitised	Publication	124	20290	2								3			20		1	2		1				2						1					3								8
21	Lourdes	834	Digitised	Publication	125	20381	2								3			17		8	2		1				1						1					4								15
21	Lourdes	834	Digitised	Publication	126	20538	2								6		1	46		4	3		3				7		4				1		1			4								24	1
21	Lourdes	834	Digitised	Publication	127	21142	2								5			28		3	3		1				4		1						1	1		2								23	1
21	Lourdes	834	Digitised	Publication	128	21393	2								5			32		3	2						2		1	1			1					2								18	2
21	Lourdes	834	Digitised	Publication	129	21589	2								7			17		12	8		1				1		2	1			1					3								2	1
21	Lourdes	834	Digitised	Publication	130	22128	2								2			15		4	5						1		1							1										2	1
21	Lourdes	834	Digitised	Publication	131	22315	2								6			31		4	6		1				2		3	1			3			1		4								33	1
21	Lourdes	834	Digitised	Publication	132	22429	2								8			27		2	1		1										1					2								20
22	Estanya	1000002	Digitised	Publication	1	19500	100											37					4																					1
23	Freychinede	700015	Digitised	Publication	1	21000	100											48.6		3	1		4										1					7.8						1		2.5
24	Lake Banyoles	931	Raw Count	EPD (E#931)	73	19762	1								12			270		2	5		1				1						1					8								5
24	Lake Banyoles	931	Raw Count	EPD (E#931)	73	19679	3								12			270		2	5		1				1						1					8								5
24	Lake Banyoles	931	Raw Count	EPD (E#931)	74	20142	1								15			296		3	8						1											12								2
24	Lake Banyoles	931	Raw Count	EPD (E#931)	74	20027	3								15			296		3	8						1											12								2
24	Lake Banyoles	931	Raw Count	EPD (E#931)	75	20303	1								12			436		6	14																	13						2		1
24	Lake Banyoles	931	Raw Count	EPD (E#931)	75	20241	3								12			436		6	14																	13						2		1
24	Lake Banyoles	931	Raw Count	EPD (E#931)	76	20472	1								12			282		4	7																	13								1
24	Lake Banyoles	931	Raw Count	EPD (E#931)	76	20364	3								12			282		4	7																	13								1
24	Lake Banyoles	931	Raw Count	EPD (E#931)	77	20880	1	1							8			323		2	14																	8								2
24	Lake Banyoles	931	Raw Count	EPD (E#931)	77	20588	3	1							8			323		2	14																	8								2
24	Lake Banyoles	931	Raw Count	EPD (E#931)	78	21276	1	1				1			7			299		2	3						1											6								4
24	Lake Banyoles	931	Raw Count	EPD (E#931)	78	21032	3	1				1			7			299		2	3						1											6								4
24	Lake Banyoles	931	Raw Count	EPD (E#931)	79	21409	1								3			26			2						2											2
24	Lake Banyoles	931	Raw Count	EPD (E#931)	79	21314	3								3			26			2						2											2
24	Lake Banyoles	931	Raw Count	EPD (E#931)	80	21562	1								3			291		33	8		1				1						1					16									3
24	Lake Banyoles	931	Raw Count	EPD (E#931)	80	21481	3								3			291		33	8		1				1						1					16									3
24	Lake Banyoles	931	Raw Count	EPD (E#931)	81	21876	1								7			249		1	3		1															20
24	Lake Banyoles	931	Raw Count	EPD (E#931)	81	21832	3								7			249		1	3		1															20
24	Lake Banyoles	931	Raw Count	EPD (E#931)	82	22263	1											249		1	6						1											31								2
24	Lake Banyoles	931	Raw Count	EPD (E#931)	82	22306	3											249		1	6						1											31								2
24	Lake Banyoles	931	Raw Count	EPD (E#931)	83	18669.8	0								2			289			15																	15								2
24	Lake Banyoles	931	Raw Count	EPD (E#931)	83	22298	1								2			289			15																	15								2
24	Lake Banyoles	931	Raw Count	EPD (E#931)	83	22335	3								2			289			15																	15								2
24	Lake Banyoles	931	Raw Count	EPD (E#931)	83	18672	2								2			289			15																	15								2
24	Lake Banyoles	931	Raw Count	EPD (E#931)	84	18945.6	0								3			180		3	1		2															5						4		1
24	Lake Banyoles	931	Raw Count	EPD (E#931)	84	22373	1								3			180		3	1		2															5						4		1
24	Lake Banyoles	931	Raw Count	EPD (E#931)	84	22436	3								3			180		3	1		2															5						4		1
24	Lake Banyoles	931	Raw Count	EPD (E#931)	84	18947	2								3			180		3	1		2															5						4		1
24	Lake Banyoles	931	Raw Count	EPD (E#931)	85	19252	0								1			62		1	1		2										2					1								1
24	Lake Banyoles	931	Raw Count	EPD (E#931)	85	22543	1								1			62		1	1		2										2					1								1
24	Lake Banyoles	931	Raw Count	EPD (E#931)	85	22991	3								1			62		1	1		2										2					1								1
24	Lake Banyoles	931	Raw Count	EPD (E#931)	85	19252	2								1			62		1	1		2										2					1								1
24	Lake Banyoles	931	Raw Count	EPD (E#931)	86	19711.7	0								2			117		1	5							2										3								2
24	Lake Banyoles	931	Raw Count	EPD (E#931)	86	23300	1								2			117		1	5							2										3								2
24	Lake Banyoles	931	Raw Count	EPD (E#931)	86	23565	3								2			117		1	5							2										3								2
24	Lake Banyoles	931	Raw Count	EPD (E#931)	86	19710	2								2			117		1	5							2										3								2
24	Lake Banyoles	931	Raw Count	EPD (E#931)	87	19898.5	0								1			144		1	4																	11								1	1
24	Lake Banyoles	931	Raw Count	EPD (E#931)	87	23447	1								1			144		1	4																	11								1	1
24	Lake Banyoles	931	Raw Count	EPD (E#931)	87	23769	3								1			144		1	4																	11								1	1
24	Lake Banyoles	931	Raw Count	EPD (E#931)	87	19893	2								1			144		1	4																	11								1	1
24	Lake Banyoles	931	Raw Count	EPD (E#931)	88	20264.8	0					1			5			210		3	9		1				3						1					8								2	1
24	Lake Banyoles	931	Raw Count	EPD (E#931)	88	23748	1					1			5			210		3	9		1				3						1					8								2	1
24	Lake Banyoles	931	Raw Count	EPD (E#931)	88	24257	3					1			5			210		3	9		1				3						1					8								2	1
24	Lake Banyoles	931	Raw Count	EPD (E#931)	88	20311	2					1			5			210		3	9		1				3						1					8								2	1
24	Lake Banyoles	931	Raw Count	EPD (E#931)	89	20631.1	0								10			136		1	3		10					1					1					11								1
24	Lake Banyoles	931	Raw Count	EPD (E#931)	89	24082	1								10			136		1	3		10					1					1					11								1
24	Lake Banyoles	931	Raw Count	EPD (E#931)	89	20724	2								10			136		1	3		10					1					1					11								1
24	Lake Banyoles	931	Raw Count	EPD (E#931)	90	20960.8	0								5			227			4		1										3					10
24	Lake Banyoles	931	Raw Count	EPD (E#931)	90	24409	1								5			227			4		1										3					10
24	Lake Banyoles	931	Raw Count	EPD (E#931)	90	21095	2								5			227			4		1										3					10
24	Lake Banyoles	931	Raw Count	EPD (E#931)	91	21327.1	0								6			210		1	6		1															8								2
24	Lake Banyoles	931	Raw Count	EPD (E#931)	91	21508	2								6			210		1	6		1															8								2
24	Lake Banyoles	931	Raw Count	EPD (E#931)	92	21693.4	0								1			51		1	1		1															3						1		1
24	Lake Banyoles	931	Raw Count	EPD (E#931)	92	21920	2								1			51		1	1		1															3						1		1
24	Lake Banyoles	931	Raw Count	EPD (E#931)	93	22059.8	0			1					7			182			4		5				1	1										15						1
24	Lake Banyoles	931	Raw Count	EPD (E#931)	93	22333	2			1					7			182			4		5				1	1										15						1
24	Lake Banyoles	931	Raw Count	EPD (E#931)	94	22462.7	0								7			225		1	9		4										1					12								1
24	Lake Banyoles	931	Raw Count	EPD (E#931)	94	22787	2								7			225		1	9		4										1					12								1
24	Lake Banyoles	931	Raw Count	EPD (E#931)	95	22829	0								4			285		1	1		2															10
24	Lake Banyoles	931	Raw Count	EPD (E#931)	95	23200	2								4			285		1	1		2															10
24	Lake Banyoles	931	Raw Count	EPD (E#931)	96	23195.3	0								6			213		1	14		1															15
25	Lac du Bouchet B5	1000001	Digitised	Publication	1	19098	100	0.30581							0.30581		0.30581	22.63		0.917431	0.30581		0.611621										3.66972					2.14067
25	Lac du Bouchet B5	1000001	Digitised	Publication	2	19264	100					0.371747			0.743494			22.6766		2.60223	0.371747						1.11524						1.85874					2.97398
25	Lac du Bouchet B5	1000001	Digitised	Publication	3	19429	100											24.5902		0.655738			0.327869				0.983607						3.60656					1.63934
25	Lac du Bouchet B5	1000001	Digitised	Publication	4	19595	100					0.190476			0.380952			10.4762		0.761905	0.190476		0.190476				0.761905						1.52381			0.190476		1.71429
25	Lac du Bouchet B5	1000001	Digitised	Publication	5	19760	100											25.3714					0.833333										5.18519					2.29508								2.62295
25	Lac du Bouchet B5	1000001	Digitised	Publication	6	19925	100								0.241546			18.1159		1.20773													1.20773					4.34783
25	Lac du Bouchet B5	1000001	Digitised	Publication	7	20091	100	0.169492										21.7714					1.66667				0.784314						6.48148					5.2459								3.77049
25	Lac du Bouchet B5	1000001	Digitised	Publication	8	20256	100					0.189036			0.189036		0.378072	10.586		0.567108	0.189036						0.189036						0.189036					2.45747
25	Lac du Bouchet B5	1000001	Digitised	Publication	9	20421	100					0.15625						20.2286					0.666667										3.88889					2.62295								2.62295
25	Lac du Bouchet B5	1000001	Digitised	Publication	10	20752	100											22.1143					0.666667										4.81481					2.29508						0.5		2.78689
25	Lac du Bouchet B5	1000001	Digitised	Publication	11	21083	100					0.190476			0.380952			18.1159		0.761905	0.190476		0.611621				0.761905						1.52381			0.190476		1.71429
25	Lac du Bouchet B5	1000001	Digitised	Publication	12	21496	100											3.4965		1.3986			0.699301										0.699301		0.699301			2.0979
25	Lac du Bouchet B5	1000001	Digitised	Publication	13	22737	100					0.3125						20.9143		1.66667			0.666667				0.392157						4.07407		0.5			2.45902								2.78689
25	Lac du Bouchet B5	1000001	Digitised	Publication	14	22902	100										0.308642	8.02469		0.308642													0.617284					1.85185
26	MD99-2348-103	1474	Raw Count	EPD (E#1474)	30	18668	2	2		0		5			0		0	43	0	3	1		3			0	3	0		0	0	3	1		0	1		10		0		0		2		5	0
26	MD99-2348-104	1474	Raw Count	EPD (E#1474)	31	18814	2	6		3		6			0		0	26	0	4	1		3			0	1	0		0	0	4	0		0	0		7		0		0		1		1	0
26	MD99-2348-105	1474	Raw Count	EPD (E#1474)	32	18965	2	14		0		6			1		0	33	0	2	0		1			0	4	0		0	0	0	1		0	0		4		0		0		0		0	0
26	MD99-2348-106	1474	Raw Count	EPD (E#1474)	33	19002	2	5		0		1			0		0	49	0	2	3		3			0	5	0		0	0	0	1		0	0		11		0		0		0		2	0
26	MD99-2348-107	1474	Raw Count	EPD (E#1474)	34	19074	2	6		1		3			0		0	39	0	4	5		4			0	0	1		0	0	1	3		1	0		8		0		0		1		7	0
26	MD99-2348-108	1474	Raw Count	EPD (E#1474)	35	19187	2	3		0		2			0		0	38	0	2	2		6			0	0	1		0	0	3	2		4	0		7		0		0		0		5	0
26	MD99-2348-109	1474	Raw Count	EPD (E#1474)	36	19265	2	14		3		3			0		0	21	0	7	1		3			0	3	0		0	0	1	0		0	0		8		0		0		2		3	0
26	MD99-2348-110	1474	Raw Count	EPD (E#1474)	37	19416	2	2		0		6			0		0	31	0	0	2		3			1	1	1		0	0	1	0		0	0		10		0		0		2		4	0
26	MD99-2348-111	1474	Raw Count	EPD (E#1474)	38	19529	2	7		1		1			0		0	34	0	0	0		4			0	1	0		0	0	3	1		0	0		5		0		0		0		6	0
26	MD99-2348-112	1474	Raw Count	EPD (E#1474)	39	19604	2	6		3		2			0		0	35	0	5	1		4			0	0	1		0	0	2	0		0	1		13		0		0		0		2	0
26	MD99-2348-113	1474	Raw Count	EPD (E#1474)	40	19724	2	8		1		7			0		1	29	0	0	0		2			0	4	1		0	0	2	1		0	0		7		0		0		2		3	0
26	MD99-2348-114	1474	Raw Count	EPD (E#1474)	41	19830	2	3		3		3			0		0	33	0	3	1		1			0	4	1		0	0	7	0		0	0		14		0		0		1		4	0
26	MD99-2348-115	1474	Raw Count	EPD (E#1474)	42	19867	2	9		2		2			0		0	26	0	3	3		6			0	0	1		0	0	3	2		0	1		7		0		0		2		2	0
26	MD99-2348-116	1474	Raw Count	EPD (E#1474)	43	19980	2	13		1		4			1		0	21	0	3	2		4			0	1	2		0	0	5	2		0	1		5		0		0		4		8	0
26	MD99-2348-117	1474	Raw Count	EPD (E#1474)	44	20093	2	7		4		3			0		0	15	0	2	3		4			0	2	1		0	0	1	0		2	1		7		0		0		0		4	0
26	MD99-2348-118	1474	Raw Count	EPD (E#1474)	45	20221	2	5		0		5			0		0	25	0	6	1		5			0	2	0		0	0	1	0		1	0		10		0		0		1		19	0
26	MD99-2348-119	1474	Raw Count	EPD (E#1474)	46	20281	2	3		3		6			0		0	19	0	4	6		2			0	2	0		0	0	4	1		0	1		5		0		0		1		3	0
26	MD99-2348-120	1474	Raw Count	EPD (E#1474)	47	20394	2	1		2		7			0		0	15	0	5	6		7			0	6	0		0	0	8	0		0	0		9		0		0		3		8	0
26	MD99-2348-121	1474	Raw Count	EPD (E#1474)	48	20506	2	4		0		5			1		0	44	0	4	3		5			0	3	0		0	0	1	0		0	1		7		0		0		3		2	0
26	MD99-2348-122	1474	Raw Count	EPD (E#1474)	49	20657	2	1		1		3			0		0	50	0	3	2		6			0	3	0		0	0	1	1		0	0		7		0		0		1		5	0
26	MD99-2348-123	1474	Raw Count	EPD (E#1474)	50	20709	2	2		1		3			0		0	29	0	3	2		2			0	1	0		2	0	1	0		0	0		5		0		0		1		16	0
26	MD99-2348-124	1474	Raw Count	EPD (E#1474)	51	20740	2	3		1		7			0		0	39	0	1	4		2			0	2	0		0	0	3	1		1	0		7		0		0		0		4	0
26	MD99-2348-125	1474	Raw Count	EPD (E#1474)	52	20756	2	4		0		2			0		0	29	0	7	2		4			0	4	0		0	0	1	2		0	0		4		0		0		0		6	0
26	MD99-2348-126	1474	Raw Count	EPD (E#1474)	53	20780	2	3		1		0			0		0	45	0	1	1		3			0	2	2		0	0	3	1		0	0		9		0		0		0		2	0
26	MD99-2348-127	1474	Raw Count	EPD (E#1474)	54	20788	2	9		1		3			0		0	14	0	8	2		5			0	2	0		0	0	0	1		0	1		3		0		0		1		4	0
26	MD99-2348-128	1474	Raw Count	EPD (E#1474)	55	20795	2	10		1		1			0		0	46	0	4	0		5			0	1	0		0	0	3	0		0	0		6		0		0		0		0	0
26	MD99-2348-129	1474	Raw Count	EPD (E#1474)	56	20813	2	3		1		6			0		0	18	0	7	3		1			0	2	3		0	0	2	0		0	0		9		0		0		1		5	0
26	MD99-2348-130	1474	Raw Count	EPD (E#1474)	57	20835	2	0		0		4			0		0	31	0	3	4		2			0	3	0		0	0	2	0		0	0		13		0		0		0		3	0
26	MD99-2348-131	1474	Raw Count	EPD (E#1474)	58	20859	2	3		2		1			1		0	33	0	0	1		2			0	6	1		0	0	0	0		0	0		8		0		0		3		8	0
26	MD99-2348-132	1474	Raw Count	EPD (E#1474)	59	21012	2	1		2		3			1		0	53	0	2	3		3			0	1	1		0	0	0	1		0	1		11		0		0		2		2	1
26	MD99-2348-133	1474	Raw Count	EPD (E#1474)	60	21093	2	2		0		7			0		0	31	0	3	0		1			0	2	2		0	0	2	2		0	0		5		0		0		3		11	0
26	MD99-2348-134	1474	Raw Count	EPD (E#1474)	61	21336	2	5		2		3			0		0	37	0	6	1		4			0	1	0		0	0	1	0		0	1		5		0		0		2		1	0
26	MD99-2348-135	1474	Raw Count	EPD (E#1474)	62	21417	2	5		2		0			0		0	31	0	1	2		2			0	4	0		0	0	3	1		1	1		6		0		0		1		7	0
26	MD99-2348-136	1474	Raw Count	EPD (E#1474)	63	21578	2	12		1		4			0		0	23	0	4	0		3			0	0	0		0	0	3	0		0	0		5		0		0		1		9	1
26	MD99-2348-137	1474	Raw Count	EPD (E#1474)	64	21902	2	7		0		8			0		0	25	0	1	2		2			0	1	0		0	0	3	0		0	0		4		0		0		2		10	0
26	MD99-2348-138	1474	Raw Count	EPD (E#1474)	65	22072	2	10		0		0			0		0	47	0	0	0		1			0	2	0		0	0	2	2		0	0		5		0		0		1		3	0
26	MD99-2348-139	1474	Raw Count	EPD (E#1474)	66	22144	2	2		1		5			0		0	27	0	0	2		4			0	4	1		0	0	3	3		1	0		5		0		0		2		8	0
26	MD99-2348-140	1474	Raw Count	EPD (E#1474)	67	22387	2	3		2		8			0		0	29	0	3	3		7			0	1	0		0	0	5	0		0	0		5		0		0		2		9	0
26	MD99-2348-141	1474	Raw Count	EPD (E#1474)	68	22710	2	4		1		0			0		0	37	0	2	2		3			0	1	0		0	0	1	1		1	0		5		0		0		2		11	0
26	MD99-2348-142	1474	Raw Count	EPD (E#1474)	69	22945	2	1		0		5			0		0	37	0	6	0		2			0	2	0		0	0	0	1		0	0		9		0		0		2		7	0
26	MD99-2348-143	1474	Raw Count	EPD (E#1474)	70	23156	2	6		0		6			0		0	37	0	0	2		3			0	2	0		0	0	3	0		0	1		6		0		0		1		10	0
27	Les Echets G - DIGI	900005	Digitised	ACER	14045	19027.2	100											11.0167					0.714101															1.7056								3.9362
27	Les Echets G - DIGI	900005	Digitised	ACER	14055	19075.5	100	0.5									0.5	10.3519					0.773301												0.5			1.58509								3.4549
27	Les Echets G - DIGI	900005	Digitised	ACER	14065	19123.2	100											9.68702					0.832501															1.46459								3.29596
27	Les Echets G - DIGI	900005	Digitised	ACER	14075	19170.4	100	0.5									0.5	9.02216					0.891701												0.5			1.34409								3.42985
27	Les Echets G - DIGI	900005	Digitised	ACER	14085	19216.9	100											8.35731					0.950901															1.22358								3.56374
27	Les Echets G - DIGI	900005	Digitised	ACER	14095	19262.9	100											7.69245					1.0101															1.10308								3.69763
27	Les Echets G - DIGI	900005	Digitised	ACER	14105	19308.4	100	0.5									0.5	7.0276					1.0693												0.5			0.982573								3.83152
27	Les Echets G - DIGI	900005	Digitised	ACER	14115	19353.2	100											6.27785					1.1285															0.862069								3.96541
27	Les Echets G - DIGI	900005	Digitised	ACER	14125	19397.5	100											5.37076					1.23607															0.741565								4.0993
27	Les Echets G - DIGI	900005	Digitised	ACER	14135	19441.3	100											4.46367					1.41619															0.619355								4.23319
27	Les Echets G - DIGI	900005	Digitised	ACER	14145	19484.5	100	0.5									0.5	4.09311					1.59631												0.5			0.490323								4.36708
27	Les Echets G - DIGI	900005	Digitised	ACER	14155	19527.2	100											4.00762					1.77643															0.36129								4.5819
27	Les Echets G - DIGI	900005	Digitised	ACER	14165	19569.3	100	0.5									0.5	3.92213					1.95655												0.5			0.232258								4.83311
27	Les Echets G - DIGI	900005	Digitised	ACER	14175	19610.9	100											3.83664					2.05173															0.103226								5.08432
27	Les Echets G - DIGI	900005	Digitised	ACER	14185	19652	100											5.12407					2.11052																							5.33553
27	Les Echets G - DIGI	900005	Digitised	ACER	14195	19692.5	100	0.5									0.5	6.53107					2.16931												0.5											5.33057
27	Les Echets G - DIGI	900005	Digitised	ACER	14205	19732.5	100											7.85368					2.2281																							5.27592
27	Les Echets G - DIGI	900005	Digitised	ACER	14215	19772	100											8.83432					2.28689																							5.22127
27	Les Echets G - DIGI	900005	Digitised	ACER	14225	19811	100											9.81496					2.34568																							5.16662
27	Les Echets G - DIGI	900005	Digitised	ACER	14235	19849.5	100	0.5									0.5	11.4908					2.40447												0.5											5.11197
27	Les Echets G - DIGI	900005	Digitised	ACER	14245	19887.4	100	0.5									0.5	12.1139					2.46326												0.5											5.05732
27	Les Echets G - DIGI	900005	Digitised	ACER	14255	19924.9	100											11.7155					2.52205																							5.00267
27	Les Echets G - DIGI	900005	Digitised	ACER	14265	19961.9	100	0.5										11.3172					2.50507												0.5											4.94802
27	Les Echets G - DIGI	900005	Digitised	ACER	14275	19998.4	100										0.5	10.9188					2.45562																							4.89337
27	Les Echets G - DIGI	900005	Digitised	ACER	14285	20034.4	100	0.5										10.5205					2.40617												0.5											4.83872
27	Les Echets G - DIGI	900005	Digitised	ACER	14295	20069.9	100											10.1221					2.35672																							5.07755
27	Les Echets G - DIGI	900005	Digitised	ACER	14305	20105	100											9.72375					2.30727																							5.31643
27	Les Echets G - DIGI	900005	Digitised	ACER	14315	20139.6	100	0.5									0.5	9.3254					2.25783												0.5											5.55532
27	Les Echets G - DIGI	900005	Digitised	ACER	14325	20173.7	100											8.67536					2.20838																							5.7942
27	Les Echets G - DIGI	900005	Digitised	ACER	14335	20207.4	100										0.5	7.40905					2.15893																							6.03308
27	Les Echets G - DIGI	900005	Digitised	ACER	14345	20240.6	100											7.23838					2.10948																							6.27196
27	Les Echets G - DIGI	900005	Digitised	ACER	14355	20273.3	100	0.5										7.38072					2.06003												0.5											6.51085
27	Les Echets G - DIGI	900005	Digitised	ACER	14365	20305.6	100										0.5	7.90968					2.01058																							6.74973
27	Les Echets G - DIGI	900005	Digitised	ACER	14375	20337.5	100	0.5										8.77362					2.34127												0.5											6.98861
27	Les Echets G - DIGI	900005	Digitised	ACER	14385	20368.9	100											9.63757					2.67196																							6.72901
27	Les Echets G - DIGI	900005	Digitised	ACER	14395	20399.9	100											10.5015					3.00265																							6.46808
27	Les Echets G - DIGI	900005	Digitised	ACER	14405	20430.5	100	0.5									0.5	11.3655					3.33333												0.5											6.20715
27	Les Echets G - DIGI	900005	Digitised	ACER	14415	20460.6	100											12.2294					3.66402																							5.94622
27	Les Echets G - DIGI	900005	Digitised	ACER	14425	20490.3	100										0.5	13.0933					3.99471															0.499232								5.68529
27	Les Echets G - DIGI	900005	Digitised	ACER	14435	20519.6	100											13.9573					4.3254															0.672043								5.42436
27	Les Echets G - DIGI	900005	Digitised	ACER	14445	20548.5	100	0.5										14.8212					4.65608												0.5			0.844854								5.16343
27	Les Echets G - DIGI	900005	Digitised	ACER	14455	20577	100	0.5									0.5	14.6559					4.98677												0.5			1.01767								5.16129
27	Les Echets G - DIGI	900005	Digitised	ACER	14465	20605.1	100											13.9836					5.06842															1.19048								5.16129
27	Les Echets G - DIGI	900005	Digitised	ACER	14475	20632.7	100											13.3113					4.7765															1.36329								5.16129
27	Les Echets G - DIGI	900005	Digitised	ACER	14485	20660	100	0.5										12.6389					4.48458															1.27496								5.3209
27	Les Echets G - DIGI	900005	Digitised	ACER	14495	20686.9	100										0.5	11.9666					4.19267															1.12135								5.78494
27	Les Echets G - DIGI	900005	Digitised	ACER	14505	20713.5	100										0.5	11.2942					3.90075															0.967742								6.24898
27	Les Echets G - DIGI	900005	Digitised	ACER	14515	20739.6	100											10.6219					3.60883															0.814132								6.71302
27	Les Echets G - DIGI	900005	Digitised	ACER	14525	20765.4	100	0.5										9.94953					3.51541															0.660522								7.17706
27	Les Echets G - DIGI	900005	Digitised	ACER	14535	20790.8	100										0.5	9.27719					3.55431															0.506912								7.64109
27	Les Echets G - DIGI	900005	Digitised	ACER	14545	20815.8	100											8.73256					3.59322																							8.10513
27	Les Echets G - DIGI	900005	Digitised	ACER	14555	20840.5	100											8.78448					3.63212																							8.56917
27	Les Echets G - DIGI	900005	Digitised	ACER	14565	20864.8	100										0.5	8.83641					3.67102												0.5											9.03321
27	Les Echets G - DIGI	900005	Digitised	ACER	14575	20888.8	100	0.5										8.88833					3.70993																							9.48891
27	Les Echets G - DIGI	900005	Digitised	ACER	14585	20912.4	100										0.5	8.94025					3.74883												0.5											9.92578
27	Les Echets G - DIGI	900005	Digitised	ACER	14595	20935.7	100	0.5										8.99218					3.78774																							10.3626
27	Les Echets G - DIGI	900005	Digitised	ACER	14605	20958.6	100											9.0441					3.82664																							10.7995
27	Les Echets G - DIGI	900005	Digitised	ACER	14615	20981.2	100										0.5	9.09602					3.86555												0.5			1.21736								11.2364
27	Les Echets G - DIGI	900005	Digitised	ACER	14625	21003.5	100	0.5										9.14795					3.90445															1.33257								11.6733
27	Les Echets G - DIGI	900005	Digitised	ACER	14635	21025.4	100											9.19987					3.94336															1.44777								12.1101
27	Les Echets G - DIGI	900005	Digitised	ACER	14645	21047.1	100											9.25179					3.98226															1.56298								12.547
27	Les Echets G - DIGI	900005	Digitised	ACER	14655	21068.4	100										0.5	9.30372					4.02116												0.5			1.67819								12.9839
27	Les Echets G - DIGI	900005	Digitised	ACER	14665	21089.4	100	0.5										9.35564					3.84208															1.79339								13.4207
27	Les Echets G - DIGI	900005	Digitised	ACER	14675	21110.1	100										0.5	9.65719					3.663												0.5			1.79593								13.1355
27	Les Echets G - DIGI	900005	Digitised	ACER	14685	21130.5	100	0.5										9.99172					3.48392															1.75017								12.5522
27	Les Echets G - DIGI	900005	Digitised	ACER	14695	21150.6	100											10.3263					3.30484															1.70442								11.9689
27	Les Echets G - DIGI	900005	Digitised	ACER	14705	21170.5	100										0.5	10.687					3.12576												0.5			1.65866								11.3855
27	Les Echets G - DIGI	900005	Digitised	ACER	14715	21190	100	0.5										11.4118					2.94668															1.6129								10.8022
27	Les Echets G - DIGI	900005	Digitised	ACER	14725	21209.3	100											12.1367					2.82719															1.21864								10.2189
27	Les Echets G - DIGI	900005	Digitised	ACER	14735	21228.4	100											12.0105					2.7673															0.824373								9.48019
27	Les Echets G - DIGI	900005	Digitised	ACER	14745	21247.2	100										0.5	11.5516					2.7074												0.5			0.430108								8.29038
27	Les Echets G - DIGI	900005	Digitised	ACER	14755	21265.8	100	0.5									0.5	11.0927					2.6475												0.5											7.49761
27	Les Echets G - DIGI	900005	Digitised	ACER	14765	21284.3	100	0.5										10.6338					2.5876																							7.78965
27	Les Echets G - DIGI	900005	Digitised	ACER	14775	21302.6	100											10.1749					2.62626																							8.0817
27	Les Echets G - DIGI	900005	Digitised	ACER	14785	21320.7	100										0.5	9.71598					3.05916																							8.37375
27	Les Echets G - DIGI	900005	Digitised	ACER	14795	21338.7	100	0.5										9.25707					3.49206																							8.6658
27	Les Echets G - DIGI	900005	Digitised	ACER	14805	21356.5	100										0.5	8.79816					3.92496																							8.95785
27	Les Echets G - DIGI	900005	Digitised	ACER	14815	21374.3	100											8.33925					4.35786																							9.2499
27	Les Echets G - DIGI	900005	Digitised	ACER	14825	21391.9	100										0.5	7.75696					4.79076																							9.54195
27	Les Echets G - DIGI	900005	Digitised	ACER	14835	21409.5	100	0.5										7.11608					5.22367												0.5											9.834
27	Les Echets G - DIGI	900005	Digitised	ACER	14845	21427.1	100											6.80851					5.65657																							10.126
27	Les Echets G - DIGI	900005	Digitised	ACER	14855	21444.6	100										0.5	6.80851					6.08947												0.5											10.4181
27	Les Echets G - DIGI	900005	Digitised	ACER	14865	21462.1	100											6.80851					6.12314																							10.7101
27	Les Echets G - DIGI	900005	Digitised	ACER	14875	21479.6	100	0.5										7.3223					5.55796																							10.1007
27	Les Echets G - DIGI	900005	Digitised	ACER	14885	21497.1	100											7.84342					4.99278												0.5											9.33748
27	Les Echets G - DIGI	900005	Digitised	ACER	14895	21514.6	100										0.5	8.36453					4.42761																							8.57429
27	Les Echets G - DIGI	900005	Digitised	ACER	14905	21532.2	100											8.88564					3.86243																							7.81109
27	Les Echets G - DIGI	900005	Digitised	ACER	14915	21549.8	100										0.5	9.40676					3.29726																							7.0479
27	Les Echets G - DIGI	900005	Digitised	ACER	14925	21567.6	100											9.92787					2.73208												0.5											6.28471
27	Les Echets G - DIGI	900005	Digitised	ACER	14935	21585.4	100	0.5										10.449					2.16691																							5.35013
27	Les Echets G - DIGI	900005	Digitised	ACER	14945	21603.3	100										0.5	10.9701					1.60173												0.5											4.12792
27	Les Echets G - DIGI	900005	Digitised	ACER	14955	21621.4	100											11.4883					1.62963																							3.93117
27	Les Echets G - DIGI	900005	Digitised	ACER	14965	21639.6	100											11.1803					2.05291																							3.87724
27	Les Echets G - DIGI	900005	Digitised	ACER	14975	21658	100											10.8724					2.47619												0.5											3.82332
27	Les Echets G - DIGI	900005	Digitised	ACER	14985	21676.6	100										0.5	10.5645					2.89947																							3.7694
27	Les Echets G - DIGI	900005	Digitised	ACER	14995	21695.4	100										0.5	10.2566					3.32275																							3.94053
27	Les Echets G - DIGI	900005	Digitised	ACER	15005	21714.4	100											9.94862					3.74603															1.35426								4.13962
27	Les Echets G - DIGI	900005	Digitised	ACER	15015	21733.6	100											9.64069					4.16931												0.5			1.20895								4.33872
27	Les Echets G - DIGI	900005	Digitised	ACER	15025	21753	100										0.5	9.33276					4.59259												0.5			1.06364								4.45528
27	Les Echets G - DIGI	900005	Digitised	ACER	15035	21772.8	100											9.02483					5.01587															0.918338								4.52722
27	Les Echets G - DIGI	900005	Digitised	ACER	15045	21792.8	100	0.5										8.72178					4.70312															0.824373								4.59915
27	Les Echets G - DIGI	900005	Digitised	ACER	15055	21813.1	100										0.5	8.64468					3.89967															0.764636								4.67108
27	Les Echets G - DIGI	900005	Digitised	ACER	15065	21833.8	100											8.56759					3.09622															0.704898								4.74301
27	Les Echets G - DIGI	900005	Digitised	ACER	15075	21854.7	100										0.5	8.14134					2.29277															0.645161								4.81494
27	Les Echets G - DIGI	900005	Digitised	ACER	15085	21876.1	100	0.947368										6.81141					1.48932															0.796371								6.43789
27	Les Echets G - DIGI	900005	Digitised	ACER	15095	21897.8	100											6.86242					0.896476															0.947581								8.82612
27	Les Echets G - DIGI	900005	Digitised	ACER	15105	21919.9	100	0.5									0.5	6.91342					1.14605															1.09879								8.38081
27	Les Echets G - DIGI	900005	Digitised	ACER	15115	21942.6	100											6.96443					1.39563												0.5			1.25								7.12984
27	Les Echets G - DIGI	900005	Digitised	ACER	15125	21965.7	100	0.5										7.01544					1.6452															1.40121								6.98925
27	Les Echets G - DIGI	900005	Digitised	ACER	15135	21989.5	100											7.06645					1.89478															1.55242								6.98925
27	Les Echets G - DIGI	900005	Digitised	ACER	15145	22013.8	100										0.5	7.11746					2.14435												0.5			1.68734								6.98925
27	Les Echets G - DIGI	900005	Digitised	ACER	15155	22038.9	100	0.5										7.6819					2.39393															1.81141								6.98925
27	Les Echets G - DIGI	900005	Digitised	ACER	15165	22064.6	100										0.5	8.37474					2.64351												0.5			1.93548								6.98925
27	Les Echets G - DIGI	900005	Digitised	ACER	15175	22091.1	100											9.06759					2.89308															2.05955								7.15538
27	Les Echets G - DIGI	900005	Digitised	ACER	15185	22118.5	100											9.76043					3.14266												0.5			2.18362								7.39068
27	Les Echets G - DIGI	900005	Digitised	ACER	15195	22146.6	100	0.5									0.5	9.65403					3.39223															2.08437								7.62597
27	Les Echets G - DIGI	900005	Digitised	ACER	15205	22175.7	100											9.35743					3.28665												0.5			1.65012								7.05215
27	Les Echets G - DIGI	900005	Digitised	ACER	15215	22205.8	100	0.5										9.06083					2.94429															1.21588								6.44823
27	Les Echets G - DIGI	900005	Digitised	ACER	15225	22236.8	100											8.76423					2.60193															0.781638								5.84431
27	Les Echets G - DIGI	900005	Digitised	ACER	15235	22268.9	100										0.5	8.46762					2.25957												0.5			0.347395								5.14738
27	Les Echets G - DIGI	900005	Digitised	ACER	15245	22302.1	100	0.5									0.5	8.20255					1.91721																							4.13027
27	Les Echets G - DIGI	900005	Digitised	ACER	15255	22336.4	100											8.36286					1.57485																							3.64968
27	Les Echets G - DIGI	900005	Digitised	ACER	15265	22371.9	100											8.52318					1.23249																							3.47174
27	Les Echets G - DIGI	900005	Digitised	ACER	15275	22408.7	100										0.5	8.68349					1.31183												0.5											3.2938
27	Les Echets G - DIGI	900005	Digitised	ACER	15285	22446.7	100	0.5										8.8438					1.4966																							3.11586
27	Les Echets G - DIGI	900005	Digitised	ACER	15295	22486.1	100	0.5										9.00412					1.68136												0.5											2.93792
27	Les Echets G - DIGI	900005	Digitised	ACER	15305	22526.8	100											9.16443					1.86613																							2.75998
27	Les Echets G - DIGI	900005	Digitised	ACER	15315	22569	100										0.5	9.32474					2.05089																							2.58204
27	Les Echets G - DIGI	900005	Digitised	ACER	15325	22612.6	100	0.5										9.48506					2.23566												0.5											4.29265
27	Les Echets G - DIGI	900005	Digitised	ACER	15335	22657.7	100										0.5	9.60715					2.33644																							6.01813
27	Les Echets G - DIGI	900005	Digitised	ACER	15345	22704.4	100											9.68104					2.35324																							6.97449
27	Les Echets G - DIGI	900005	Digitised	ACER	15355	22752.7	100										0.5	9.75494					2.37003																							7.92935
27	Les Echets G - DIGI	900005	Digitised	ACER	15365	22802.7	100	0.5										9.82883					2.38683												0.5											8.88421
27	Les Echets G - DIGI	900005	Digitised	ACER	15375	22854.4	100											9.79175					2.40363												0.5			1.71183								10.429
27	Les Echets G - DIGI	900005	Digitised	ACER	15385	22907.8	100											8.96541					2.42042															1.32473								12.0821
27	Les Echets G - DIGI	900005	Digitised	ACER	15395	22963	100										0.5	8.13908					2.43722															0.937634								10.733
28	La Grotte Walou	700018	Digitised	Publication	1	21200	100					0.5			2			9		13	39			6														1.3								8
29	Bergsee	800002	Digitised	Publication	1	21000	100	0.2										8.6		0.4	1		5.6				1.4						1.1					1.3						0.2
30	Garaat El-Ouez	1501	Raw Count	EPD (E#1501)	43	18792	2								4			9		1	1						2						10		3			5								128
30	Garaat El-Ouez	1501	Raw Count	EPD (E#1501)	44	18977	2	3				1			20			33		7	3						1						4		14	1		13							2	283
30	Garaat El-Ouez	1501	Raw Count	EPD (E#1501)	45	19161	2								11			8		7	7						3						10		12	3		26								108
30	Garaat El-Ouez	1501	Raw Count	EPD (E#1501)	46	19337	2								7			9		11	22						5						7		7	2		5								52
30	Garaat El-Ouez	1501	Raw Count	EPD (E#1501)	47	19521	2								3			2			2														5	5		2								80	1
30	Garaat El-Ouez	1501	Raw Count	EPD (E#1501)	48	19706	2					2			6			34		42	5						2		1				4			7		4				1				140	2
31	Pian del Lago	800006	Digitised	Publication	1	21260	100	6.1				1.4						14.4		1.9	1.4		2.1					0.7					1.2	0.2				2.1						0.5
32	Pilsensee	700030	Digitised	Publication	1	19073	100								0.2			0.9					35.4															0.3
33	Orgiano	700028	Digitised	Publication	1	20531	100	4.7				4.6											2.7																							31
34	Lago della Costa	700020	Digitised	Publication	1	18600	100						0.8	0.8	1.2			24					7															0.4								14
34	Lago della Costa	700020	Digitised	Publication	2	18750	100	1					0.8					12					18															0.4								17
34	Lago della Costa	700020	Digitised	Publication	3	19400	100	2					0.8	0.8	1.3			15					6									1						0.4								16
34	Lago della Costa	700020	Digitised	Publication	4	20400	100						0.8	0.8	1.3			18					5									1						0.4								14
34	Lago della Costa	700020	Digitised	Publication	5	21400	100						0.8	0.8	1.4			12					3									1						0.4								15
34	Lago della Costa	700020	Digitised	Publication	6	23100	100						0.8	0.8	1.2			12					3									1						0.4								15
34	Lago della Costa	700020	Digitised	Publication	7	23200	100							0.8	1.3			12					3									1						0.4								15
34	Lago della Costa	700020	Digitised	Publication	8	23250	100							0.8	1.3			12					3									1						0.4								15
35	Lagaccione	916	Raw Count	ACER	82	21000						1			6			134		6	1						2						3					15								1
35	Lagaccione	916	Raw Count	ACER	83	21000									2			83		3													1					5								2
35	Lagaccione	916	Raw Count	ACER	84	21000						1			1			112		25	2						1						4					13								1
35	Lagaccione	916	Raw Count	ACER	85	21000									1			93		21							3						2					3								1
35	Lagaccione	916	Raw Count	ACER	86	21000									3			100		5													3					11
35	Lagaccione	916	Raw Count	ACER	87	21000									8			134		14	3						2						3					11								3
35	Lagaccione	916	Raw Count	ACER	88	21000									7		1	95		10	1						1						4					1								3
36	Lago Vico	54092	Digitised	Publication	64	19056.9	100	0.5							1			68		7	1						1											7
36	Lago Vico	54092	Digitised	Publication	65	19508.6	100					2			3			125		9	1		1				2									1		12								2
36	Lago Vico	54092	Digitised	Publication	66	19960.3	100								5			100		6	3						1						1		1			8
36	Lago Vico	54092	Digitised	Publication	67	20412.1	100								2			82		6	4																	18									1
36	Lago Vico	54092	Digitised	Publication	68	20688.9	100								3			126		8	4						1						1					5								1
36	Lago Vico	54092	Digitised	Publication	69	20907.4	100	1										125		15	1		1				2						2					8
36	Lago Vico	54092	Digitised	Publication	70	21125.9	100								3			127		9	3		1				2						1					8								1	2
36	Lago Vico	54092	Digitised	Publication	71	21344.4	100					1			2			110		13	4		1				5						2					9
36	Lago Vico	54092	Digitised	Publication	72	21563	100								1			73		3							2						1					4								1
36	Lago Vico	54092	Digitised	Publication	73	21781.5	100											55		4	7						1											15								1
36	Lago Vico	54092	Digitised	Publication	74	22000	100	0.5							1			19		3	23						4						2					13
36	Lago Vico	54092	Digitised	Publication	75	22250	100	0.5										97		4	18						6											32								1
36	Lago Vico	54092	Digitised	Publication	76	22500	100								6			108		17	3						4									1		12									1
36	Lago Vico	54092	Digitised	Publication	77	22750	100					1			5			121		14	2						1								1			9
36	Lago Vico	54092	Digitised	Publication	78	23000	100					1			3			109		16							1						1			1		12								1
37	Stracciacappa	900009	Raw Count	ACER	7058	19973.9	100								4			158		17							1						1					30						1
37	Stracciacappa	900009	Raw Count	ACER	7059	21699.2	100								8			92		36													4					24								1
38	Lago di Monterosi	51017	Raw Count	Publication	24	20914	100											85	14				1
39	Venice	800007	Digitised	Publication	1	21000	100											2	2				2
40	Azzano Decimo	900008	Raw Count	ACER	17601	21785.4	100											22		3			1				2									1		5								213
40	Azzano Decimo	900008	Raw Count	ACER	17602	22031.3	100							1	1			15		3			5				1						1					5								194
40	Azzano Decimo	900008	Raw Count	ACER	17603	22568.8	100							1	1			6		1	3		2				3						1					2						1		12
40	Azzano Decimo	900008	Raw Count	ACER	17604	22665.3	100								1			23		6	1		8										1			4		9								422
40	Azzano Decimo	900008	Raw Count	ACER	17605	22923.2	100											29		1	4		3				5									1		6								126
40	Azzano Decimo	900008	Raw Count	ACER	17606	22971.4	100							1	4			31		1	1		3				1											2								193
41	Valle di Castiglione	900010	Raw Count	ACER	610	20649.7	100											4		78	3												1		1			64
41	Valle di Castiglione	900010	Raw Count	ACER	611	22001.6	100								2					37	8												2					190								1
42	Travesio	700039	Digitised	Publication	1	22483	100														1.8																	0.4								2.9
43	Orvenco	800010	Digitised	Publication	1	21221	100														9																	0.9								19
44	Rio Doidis	700031	Digitised	Publication	1	22390	100											0.4																				1.1								0.5
45	Billerio	700004	Digitised	Publication	1	21872	100														28.9		1.3															0.3								0.5
46	Kersdorf-Briesen	700017	Digitised	Publication	1	21183	100											4					21																							8.5
47	Lago Grande di Monticchio	932	Raw Count	EPD (E#932)	63	18693	1	1							7			69		4	2		6				1						1			1		14								2
47	Lago Grande di Monticchio	932	Raw Count	EPD (E#932)	64	18693.8	0								3			73	6	1	2		3				1						1					9								3
47	Lago Grande di Monticchio	932	Raw Count	EPD (E#932)	64	19046	1								3			73	6	1	2		3				1						1					9								3
47	Lago Grande di Monticchio	932	Raw Count	EPD (E#932)	65	18826.9	0					4			7			64	3	3	1		4				2						3					7					1			4
47	Lago Grande di Monticchio	932	Raw Count	EPD (E#932)	65	19182	1					4			7			64	3	3	1		4				2						3					7					1			4
47	Lago Grande di Monticchio	932	Raw Count	EPD (E#932)	66	19059.7	0								3			43		6	1		1													1		5								10
47	Lago Grande di Monticchio	932	Raw Count	EPD (E#932)	66	19281	1								3			43		6	1		1													1		5								10
47	Lago Grande di Monticchio	932	Raw Count	EPD (E#932)	67	19365.4	0	0							3			29		8							2						5					18								14
47	Lago Grande di Monticchio	932	Raw Count	EPD (E#932)	67	19610	2	0							3			29		8							2						5					18								14
47	Lago Grande di Monticchio	932	Raw Count	EPD (E#932)	67	19699	1	0							3			29		8							2						5					18								14
47	Lago Grande di Monticchio	932	Raw Count	EPD (E#932)	68	19522.5	0								7			66	2	9	2												1	2		1		8					1			17
47	Lago Grande di Monticchio	932	Raw Count	EPD (E#932)	68	19721	2								7			66	2	9	2												1	2		1		8					1			17
47	Lago Grande di Monticchio	932	Raw Count	EPD (E#932)	68	19837	1								7			66	2	9	2												1	2		1		8					1			17
47	Lago Grande di Monticchio	932	Raw Count	EPD (E#932)	69	19696.1	0								8			51	1	8	1		1			1							3					13								4
47	Lago Grande di Monticchio	932	Raw Count	EPD (E#932)	69	19930	2								8			51	1	8	1		1			1							3					13								4
47	Lago Grande di Monticchio	932	Raw Count	EPD (E#932)	69	19975	1								8			51	1	8	1		1			1							3					13								4
47	Lago Grande di Monticchio	932	Raw Count	EPD (E#932)	70	19958	0					1			3			47	1	9	2		1															5								4
47	Lago Grande di Monticchio	932	Raw Count	EPD (E#932)	70	20223	2					1			3			47	1	9	2		1															5								4
47	Lago Grande di Monticchio	932	Raw Count	EPD (E#932)	70	20224	1					1			3			47	1	9	2		1															5								4
47	Lago Grande di Monticchio	932	Raw Count	EPD (E#932)	71	20095.9	0					1			3			43	1	9	7		2										2					10								1
47	Lago Grande di Monticchio	932	Raw Count	EPD (E#932)	71	24315	2					1			3			43	1	9	7		2										2					10								1
47	Lago Grande di Monticchio	932	Raw Count	EPD (E#932)	71	20360	1					1			3			43	1	9	7		2										2					10								1
47	Lago Grande di Monticchio	932	Raw Count	EPD (E#932)	72	20222.6	0	1				2			6			39	2	4	2		1			1	2						2					5								11
47	Lago Grande di Monticchio	932	Raw Count	EPD (E#932)	72	24474	2	1				2			6			39	2	4	2		1			1	2						2					5								11
47	Lago Grande di Monticchio	932	Raw Count	EPD (E#932)	72	20497	1	1				2			6			39	2	4	2		1			1	2						2					5								11
47	Lago Grande di Monticchio	932	Raw Count	EPD (E#932)	73	20771	1					7			4			110		13							1						2					28						2		3
47	Lago Grande di Monticchio	932	Raw Count	EPD (E#932)	74	20909	1	5							1			67	6	3	3						1						4					65								1
47	Lago Grande di Monticchio	932	Raw Count	EPD (E#932)	75	21071	1								5			111	2	8	4		3							1			3			2		38
47	Lago Grande di Monticchio	932	Raw Count	EPD (E#932)	76	21516	1	5				2			6			24	8	18	50		1									1	8					8								3
47	Lago Grande di Monticchio	932	Raw Count	EPD (E#932)	77	21880	1	8				11			2			78	3	3	7											4	4			1		11								4
47	Lago Grande di Monticchio	932	Raw Count	EPD (E#932)	78	22017	1	3				3			8			128		15	1		2				2											38								4
47	Lago Grande di Monticchio	932	Raw Count	EPD (E#932)	79	22266	1	1				3			5			122	1	13	6						2					1	8			2		31								4
47	Lago Grande di Monticchio	932	Raw Count	EPD (E#932)	80	22404	1	1		1		3			6			50		21	1		2										7					15								5
47	Lago Grande di Monticchio	932	Raw Count	EPD (E#932)	81	22519	1								9			50	2	11	5		2				3						8					9								3
47	Lago Grande di Monticchio	932	Raw Count	EPD (E#932)	82	22775	1	1							7			60	1	7	2		2				1						5	1		1		5								6
47	Lago Grande di Monticchio	932	Raw Count	EPD (E#932)	83	22913	1	11				5			3			30		7	6		2				1					2	6					21								6
47	Lago Grande di Monticchio	932	Raw Count	EPD (E#932)	84	23266	1			1		1			1			42		7	1		2															7								5
48	Nagymohos Pleistocene	54087	Raw Count	Publication	19	19605	100								2			41			8			4	2		2						2					2								1634
48	Nagymohos Pleistocene	54087	Raw Count	Publication	20	20220	100								3			63			9			6	3		3						3					3								1308
48	Nagymohos Pleistocene	54087	Raw Count	Publication	21	20710	100								3			42			9			6	3		3						3					3								876
48	Nagymohos Pleistocene	54087	Raw Count	Publication	22	21370	100								3			18			9			3														3								441
48	Nagymohos Pleistocene	54087	Raw Count	Publication	23	21505	100								9			15						15			3						9													585
48	Nagymohos Pleistocene	54087	Raw Count	Publication	24	21680	100								3			18		6	9			18			3						6					3								528
48	Nagymohos Pleistocene	54087	Raw Count	Publication	25	21795	100											42		3	15			6	6		21						3					6								828	3
48	Nagymohos Pleistocene	54087	Raw Count	Publication	26	21900	100											27		3	3				9													6								378
48	Nagymohos Pleistocene	54087	Raw Count	Publication	27	22000	100								3			93						6	6		12						3					18							3	858
48	Nagymohos Pleistocene	54087	Raw Count	Publication	28	22105	100								3			57		132				15			3				3														6
48	Nagymohos Pleistocene	54087	Raw Count	Publication	29	22215	100						4		4			36			18			22	4		8				2		4					6							2	480
48	Nagymohos Pleistocene	54087	Raw Count	Publication	30	22505	100								6			84			12			3	15		6					3	3											3	6	963
48	Nagymohos Pleistocene	54087	Raw Count	Publication	31	22690	100						2		4			40		2	12			35	5		10						4					4							2	418
48	Nagymohos Pleistocene	54087	Raw Count	Publication	32	22830	100								3			51			9			18	9					3			3					3						3	15	1044
49	Safarka	700033	Digitised	Publication	1	21912	100							6	3.5					1	1.2			5	1							0.5												0.5
50	Feher-to	54079	Raw Count	Publication	8	19297	100														5		2
50	Feher-to	54079	Raw Count	Publication	9	19856	100					2						4		2	4		9
50	Feher-to	54079	Raw Count	Publication	10	20415	100					1						1			4		28															4
50	Feher-to	54079	Raw Count	Publication	11	20799	100					6			4			4		2	12		39																					20		28
50	Feher-to	54079	Raw Count	Publication	12	21148	100											6		3			28									3												9		3
50	Feher-to	54079	Raw Count	Publication	13	21497	100														11		4																					6
50	Feher-to	54079	Raw Count	Publication	14	21846	100					3									14											9												2
50	Feher-to	54079	Raw Count	Publication	15	22196	100					9			4			2			2		32									8												9
50	Feher-to	54079	Raw Count	Publication	16	22545	100					1						13		8	4											1						1						1
50	Feher-to	54079	Raw Count	Publication	17	22894	100											10		3	33		6									1	1					3								79
51	Ioannina	900006	Raw Count	ACER	20224	19036	100	5		1		2			2			58		12	5		4				4					1	8					13						3		2
51	Ioannina	900006	Raw Count	ACER	20225	19227.8	100	1.5							4			51		6	2		5				2					1	2			1		16						1		6
51	Ioannina	900006	Raw Count	ACER	20226	19409	100	8.5				1			8			53		13	6		2				2					2	4					8								8
51	Ioannina	900006	Raw Count	ACER	20227	19483.6	100	8				2			4			32		8			8				2					2	2					9					1	1	1	9
51	Ioannina	900006	Raw Count	ACER	20228	19941.9	100	6				1			2			44		2	1		4				2						1					13								6
51	Ioannina	900006	Raw Count	ACER	20229	20005.8	100	9							5			42		9	2		6				1					1						7						1		1
51	Ioannina	900006	Raw Count	ACER	20230	20314.9	100	2.5				2			2			46		6			9				4						1					11								7
51	Ioannina	900006	Raw Count	ACER	20231	20741.2	100	3				1			7			41		5	1		7				2						1			1		8							1	10
51	Ioannina	900006	Raw Count	ACER	20232	21167.5	100	7				3			7			42		5	3		3				3					2						11						2		11
51	Ioannina	900006	Raw Count	ACER	20233	21647.1	100	20							3			46		8	3		3				2						2					8								1
51	Ioannina	900006	Raw Count	ACER	20234	21913.5	100	2				2			6			49		12	3		6				1					2	3					7						2		14
51	Ioannina	900006	Raw Count	ACER	20235	22030.8	100	4							8			36		5	1		7													2		5								15
51	Ioannina	900006	Raw Count	ACER	20236	22180	100	4.5				3			5			51		13	7		5										2					9						5		16
51	Ioannina	900006	Raw Count	ACER	20237	22286.6	100	4.5				1			4			61		14	1		6				3					1	4					5						2		24
51	Ioannina	900006	Raw Count	ACER	20238	22382.5	100	3				2			3			50		5	2		5				1					4						9						3		13
51	Ioannina	900006	Raw Count	ACER	20239	22478.4	100	3.5				1			6			56		8	6		5															5						2		7
51	Ioannina	900006	Raw Count	ACER	20240	22553	100	5.5				1			10			42		8	1		5				5					5	5					8					1		1	28
51	Ioannina	900006	Raw Count	ACER	20241	22776.8	100	10							10			62		9	2		4				4					2	2					8						5		16
51	Ioannina	900006	Raw Count	ACER	20242	22883.4	100	4.5				2			6			29		5	3		3				3					2						13						5	1	13
51	Ioannina	900006	Raw Count	ACER	20243	22936.7	100	3				2			6			42		10	4		6				1											8								12
52	Kokad	800008	Raw Count	Publication	1	19118	100							1	1			17	4	2				6	1		4									2		11							2	1420
52	Kokad	800008	Raw Count	Publication	2	19439.7	100								1			4	9	4				11			9						5					4						1		202
53	Lake Xinias	976	Raw Count	EPD (E#976)	24	19130.7	0	1				2			3			150		11	13		3													22		639								23	1
53	Lake Xinias	976	Raw Count	EPD (E#976)	25	19488.2	0											10			2																	441								2
53	Lake Xinias	976	Raw Count	EPD (E#976)	26	19845.8	0	2		2		2			4			96	1	14	9		2				2						2			7		414								12	1
53	Lake Xinias	976	Raw Count	EPD (E#976)	27	20203.3	0	1							6			101	1	11	3		2													4		149						1		2
53	Lake Xinias	976	Raw Count	EPD (E#976)	28	20560.8	0	3							10			185	1	28	13		9				5						1			13		170								19
53	Lake Xinias	976	Raw Count	EPD (E#976)	29	20153	1	5		1		4			7			108		16	4		5				5						3			12		114			1					12	1
53	Lake Xinias	976	Raw Count	EPD (E#976)	29	20024	3	5		1		4			7			108		16	4		5				5						3			12		114			1					12	1
53	Lake Xinias	976	Raw Count	EPD (E#976)	29	21275.9	0	5		1		4			7			108		16	4		5				5						3			12		114			1					12	1
53	Lake Xinias	976	Raw Count	EPD (E#976)	30	21295	1	9		2	1	4			9			183		27	8		20				14			1			3			8		118						3		44
53	Lake Xinias	976	Raw Count	EPD (E#976)	30	20369	3	9		2	1	4			9			183		27	8		20				14			1			3			8		118						3		44
53	Lake Xinias	976	Raw Count	EPD (E#976)	30	21990.9	0	9		2	1	4			9			183		27	8		20				14			1			3			8		118						3		44
53	Lake Xinias	976	Raw Count	EPD (E#976)	31	22279	1	9							8			125	1	21	2		10				24						1			12		100						2		36	2
53	Lake Xinias	976	Raw Count	EPD (E#976)	31	21062	3	9							8			125	1	21	2		10				24						1			12		100						2		36	2
53	Lake Xinias	976	Raw Count	EPD (E#976)	31	22706	0	9							8			125	1	21	2		10				24						1			12		100						2		36	2
53	Lake Xinias	976	Raw Count	EPD (E#976)	32	23263	1	5				4			28			144		17	4		13				38						4			6		67						1		152
53	Lake Xinias	976	Raw Count	EPD (E#976)	32	21424	3	5				4			28			144		17	4		13				38						4			6		67						1		152
53	Lake Xinias	976	Raw Count	EPD (E#976)	33	24294	1	2		1		11			23			241	1	26	5		29				12						5			6		80						2		165	1
53	Lake Xinias	976	Raw Count	EPD (E#976)	33	22347	3	2		1		11			23			241	1	26	5		29				12						5			6		80						2		165	1
53	Lake Xinias	976	Raw Count	EPD (E#976)	34	23304	3	3				6			45			271	2	41	7		38				42					1	5			14		135				1		1		581
53	Lake Xinias	976	Raw Count	EPD (E#976)	35	24071	3	2			1	5			32			226	2	25	8		22			1	36			1		1	8			8		133			1			1	1	542
53	Lake Xinias	976	Raw Count	EPD (E#976)	38	19846	2	1				4			39			286	1	31	7		19				12						4			9		95								81
53	Lake Xinias	976	Raw Count	EPD (E#976)	39	20609	2	2		1	2	4			37			369	4	30	13		18				36			1			11			16		153								244
53	Lake Xinias	976	Raw Count	EPD (E#976)	40	21488	2	1				1			25			193		27	10		10				12			1			1			9		86								110
53	Lake Xinias	976	Raw Count	EPD (E#976)	41	22356	2	1				3			28			201	1	23	6		11				23						1			9		99								220
53	Lake Xinias	976	Raw Count	EPD (E#976)	42	23281	2	3				9			24			222		36	18		17			4	18						11			18		145						1		336
53	Lake Xinias	976	Raw Count	EPD (E#976)	43	23993	2	2		1		4			33			167		40	6		8			1	14						2			12		87								129	1
54	Mickunai	700027	Digitised	Publication	1	21000	100					11.7			0.5			8.4	3				19.3						0.4			3.1						2.3						6.4		7.7
55	Lake Sfanta Anna	700023	Digitised	Publication	1	20955	100											3.5					1.5		0.9							0.5						2								4.4
56	Lesvos ML01 Megali Limni	700026	Digitised	Publication	1	22906	100								1.9			40.1					2.2										0.6											0.9		38.9
57	Straldzha	800009	Raw Count	Publication	1	19933	100							1	1			77	2	7	2		3				1											12						1		13
57	Straldzha	800009	Raw Count	Publication	2	20998	100											184	3	19	5		6				1						1					30								15
57	Straldzha	800009	Raw Count	Publication	3	22063	100								1			88	3	14	2		3															26								22
58	MD01-2430	800004	Digitised	Publication	1	21000	100	1.2				0.9						23.4		8.1	9.9		3									1.8				3.6		9.9						1.8
59	Lake Iznik	2323	Raw Count	EPD (E#714)	83	18653	1					1			1			65		102	24		2				7			1			6			10		99								2
59	Lake Iznik	2323	Raw Count	EPD (E#714)	84	19076	1	1							1			127		77	9		10				5			1			12			2		60								4
59	Lake Iznik	2323	Raw Count	EPD (E#714)	85	19961	1								1			97		74	18		5				4						9			8		41								1
59	Lake Iznik	2323	Raw Count	EPD (E#714)	86	20649	1											96		76	20						5						7			8		30				1				4	1
59	Lake Iznik	2323	Raw Count	EPD (E#714)	87	21125	1											114		82	19		3				5						7			7		33								1
59	Lake Iznik	2323	Raw Count	EPD (E#714)	88	21654	1			1		1						128		61	19		2				4						5			2		48								1
59	Lake Iznik	2323	Raw Count	EPD (E#714)	89	22793	1	1		1								67	1	80	24						5						9			7		23						1
60	M72/5_628-1	600006	Raw Count	Pangaea (833387)	1	19893	100	1		1		3			1			91	5	15	7						3			1		1	2			1		30						4		1
60	M72/5_628-1	600006	Raw Count	Pangaea (833387)	2	20398	100	2										69	2	17	14		2				4					1			1	1		31						2		3
60	M72/5_628-1	600006	Raw Count	Pangaea (833387)	3	20709	100	1		1								76		22	9		1				2	1				1						27						14		4
60	M72/5_628-1	600006	Raw Count	Pangaea (833387)	4	21371	100	2							1			102		8	4		1				2					1	1		1	1		39						8		6
60	M72/5_628-1	600006	Raw Count	Pangaea (833387)	5	22254	100											100	2	12	5		2				2					4	1			1		32						3
60	M72/5_628-1	600006	Raw Count	Pangaea (833387)	6	22916	100	1		1								73	4	5	18		2				6					4						17						11		3
61	Dziguta Core 1	700012	Digitised	Publication	1	21000	100	3										3	0.5		0.2		1																							1.5
62	Lake Van LG	600003	Raw Count	Pangaea (853779)	23	19044	100							1				189		12	3						3						4			1		176								2
62	Lake Van LG	600003	Raw Count	Pangaea (853779)	24	19498	100											204		14	8		1				2			2			1			1		175								2
62	Lake Van LG	600003	Raw Count	Pangaea (853779)	25	19936	100											283		8	6						1											116								2
62	Lake Van LG	600003	Raw Count	Pangaea (853779)	26	20374	100											178		10	6		1				4					1	3			7		183								2
62	Lake Van LG	600003	Raw Count	Pangaea (853779)	27	20813	100											218	5	10	4		1				5			5								145								3
62	Lake Van LG	600003	Raw Count	Pangaea (853779)	28	21227	100											163	1	14	5		1				1						3					164								2
62	Lake Van LG	600003	Raw Count	Pangaea (853779)	29	21666	100							2				197		17	3						1			1			4			2		145								2
62	Lake Van LG	600003	Raw Count	Pangaea (853779)	30	22104	100											164		22	6		1				5						1			1		146								5
62	Lake Van LG	600003	Raw Count	Pangaea (853779)	31	22542	100											218		12	5		1				3			1			4			1		125								3
62	Lake Van LG	600003	Raw Count	Pangaea (853779)	32	22981	100							2				157		12	15						6			3			1			2		118								6
63	Lake Zeribar	714	Raw Count	EPD (E#714)	70	19634	1								56			81		3	1						10											103			1					3
63	Lake Zeribar	714	Raw Count	EPD (E#714)	70	19634	2								56			81		3	1						10											103			1					3
63	Lake Zeribar	714	Raw Count	EPD (E#714)	71	20031	1								85			154		4	4						11			1			1			1		172			4					27
63	Lake Zeribar	714	Raw Count	EPD (E#714)	71	20031	2								85			154		4	4						11			1			1			1		172			4					27
63	Lake Zeribar	714	Raw Count	EPD (E#714)	72	20289	1					1			124			251		8	2						14						4			3		399			2					2
63	Lake Zeribar	714	Raw Count	EPD (E#714)	72	20289	2					1			124			251		8	2						14						4			3		399			2					2
63	Lake Zeribar	714	Raw Count	EPD (E#714)	73	20516	1					1			47			79		2	1					1	5											90			1					3
63	Lake Zeribar	714	Raw Count	EPD (E#714)	73	20516	2					1			47			79		2	1					1	5											90			1					3
63	Lake Zeribar	714	Raw Count	EPD (E#714)	74	21283	1					1			114			240	1	6	3						7			2			2		1	1		252								10
63	Lake Zeribar	714	Raw Count	EPD (E#714)	74	21283	2					1			114			240	1	6	3						7			2			2		1	1		252								10
63	Lake Zeribar	714	Raw Count	EPD (E#714)	75	21435	1								31			68		2							4						1			1		118
63	Lake Zeribar	714	Raw Count	EPD (E#714)	75	21435	2								31			68		2							4						1			1		118
63	Lake Zeribar	714	Raw Count	EPD (E#714)	76	21474	1								8			29	2	5	1												5			3		151			3	1				1
63	Lake Zeribar	714	Raw Count	EPD (E#714)	76	21474	2								8			29	2	5	1												5			3		151			3	1				1
63	Lake Zeribar	714	Raw Count	EPD (E#714)	77	21708	1				1				94			197		7	1		1				12						4			2		337			3					3
63	Lake Zeribar	714	Raw Count	EPD (E#714)	77	21708	2				1				94			197		7	1		1				12						4			2		337			3					3
63	Lake Zeribar	714	Raw Count	EPD (E#714)	78	22216	1								37			100		7							6						1			1		121			1					2	1
63	Lake Zeribar	714	Raw Count	EPD (E#714)	78	22216	2								37			100		7							6						1			1		121			1					2	1
63	Lake Zeribar	714	Raw Count	EPD (E#714)	79	22318	1								105			134		2	4						6						1			3		202			3					13
63	Lake Zeribar	714	Raw Count	EPD (E#714)	79	22318	2								105			134		2	4						6						1			3		202			3					13
63	Lake Zeribar	714	Raw Count	EPD (E#714)	80	22505	1								180			208		7	4						6						2			4		331			2					5
63	Lake Zeribar	714	Raw Count	EPD (E#714)	80	22505	2								180			208		7	4						6						2			4		331			2					5
63	Lake Zeribar	714	Raw Count	EPD (E#714)	81	22724	1								42			101	1	10	1						14						2			2		166			1					3
63	Lake Zeribar	714	Raw Count	EPD (E#714)	81	22724	2								42			101	1	10	1						14						2			2		166			1					3
63	Lake Zeribar	714	Raw Count	EPD (E#714)	82	23064	1				1				62			99		2	2						5						2			1		158								8
63	Lake Zeribar	714	Raw Count	EPD (E#714)	82	23064	2				1				62			99		2	2						5						2			1		158								8
63	Lake Zeribar	714	Raw Count	EPD (E#714)	83	23508	1								40			80	1	2							3									1		111			1					3
63	Lake Zeribar	714	Raw Count	EPD (E#714)	83	23508	2								40			80	1	2							3									1		111			1					3
63	Lake Zeribar	714	Raw Count	EPD (E#714)	84	23881	1								16			61	3	4	3						1						3			5		172			2					4
63	Lake Zeribar	714	Raw Count	EPD (E#714)	84	23881	2								16			61	3	4	3						1						3			5		172			2					4
63	Lake Zeribar	714	Raw Count	EPD (E#714)	85	23956	1								49			90		1	1						6									1		125			1					2
63	Lake Zeribar	714	Raw Count	EPD (E#714)	85	23956	2								49			90		1	1						6									1		125			1					2
63	Lake Zeribar	714	Raw Count	EPD (E#714)	86	24264	1				1				117			258	2	11							19			1			2			3		325			1					5
63	Lake Zeribar	714	Raw Count	EPD (E#714)	86	24264	2				1				117			258	2	11							19			1			2			3		325			1					5
[truncated: 198 more columns]
