# Supplementary material for: The climate and vegetation of Europe, northern Africa, and the Middle East during the Last Glacial Maximum (21 000 yr BP) based on pollen data
Source: Copernicus journal article supplement (doi:10.5194/cp-20-1939-2024), 2024-09-11
Supplement: Supplementary file [file cp-20-1939-2024-supplement-title-page.pdf › cp-20-1939-2024-supplement-title-page.pdf]

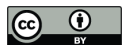

*Supplement of*

**The climate and vegetation of Europe, northern Africa, and the Middle East during the Last Glacial Maximum (21 000 yr BP) based on pollen data**

**Basil A. S. Davis et al.**

*Correspondence to:* Basil A. S. Davis ([basil.davis@unil.ch](mailto:basil.davis@unil.ch))

- [cp-20-1939-2024-supplement-title-page.pdf](#)
- [Davis et al 2024 Figure data and LGM pollen counts.xlsx](#)

The copyright of individual parts of the supplement might differ from the article licence.
